1 **Poly(ADP-ribose) potentiates ZAP antiviral activity**

2

3 Guangai Xue<sup>1</sup>, Klaudia Braczyk<sup>1</sup>, Daniel Gonçalves-Carneiro<sup>2</sup>, Daria M. Dawidziak<sup>1</sup>, Katarzyna

4 Zawada<sup>1</sup>, Heley Ong<sup>2</sup>, Yueping Wan<sup>1</sup>, Kaneil K. Zadrozny<sup>1</sup>, Barbie K. Ganser-Pornillos<sup>1</sup>, Paul

5 D. Bieniasz<sup>2</sup>, Owen Pornillos<sup>1\*</sup>

6

7 <sup>1</sup>Department of Molecular Physiology and Biological Physics, University of Virginia,

8 Charlottesville, Virginia

9 <sup>2</sup>Laboratory of Retrovirology, Howard Hughes Medical Institute, The Rockefeller University,

10 New York, New York

11

12 \*Correspondence: [opornillos@virginia.edu](mailto:opornillos@virginia.edu)

13

14 **Abstract**

15

16 Zinc-finger antiviral protein (ZAP), also known as poly(ADP-ribose) polymerase 13 (PARP13),  
17 is an antiviral factor that selectively targets viral RNA for degradation. ZAP is active against  
18 both DNA and RNA viruses, including important human pathogens such as hepatitis B virus and  
19 type 1 human immunodeficiency virus (HIV-1). ZAP selectively binds CpG dinucleotides  
20 through its N-terminal RNA-binding domain, which consists of four zinc fingers. ZAP also  
21 contains a central region that consists of a fifth zinc finger and two WWE domains. Through  
22 structural and biochemical studies, we found that the fifth zinc finger and tandem WWEs of ZAP  
23 combine into a single integrated domain that binds to poly(ADP-ribose) (PAR), a cellular  
24 polynucleotide. PAR binding is mediated by the second WWE module of ZAP and likely  
25 involves specific recognition of *iso*(ADP-ribose), a repeating structural unit of PAR. Mutation of  
26 the putative *iso*(ADP-ribose) binding site in ZAP abrogates the interaction *in vitro* and  
27 diminishes ZAP activity against a CpG-rich HIV-1 reporter virus. In cells, PAR facilitates  
28 formation of non-membranous sub-cellular compartments such as DNA repair foci, spindle poles  
29 and cytosolic RNA stress granules. Our results suggest that ZAP-mediated viral mRNA  
30 degradation is facilitated by PAR, and provides a biophysical rationale for the reported  
31 association of ZAP with RNA stress granules.

32

## 33 Introduction

34

35 Cells encode a variety of nucleic acid sensors that detect the presence of viral RNA or DNA by  
36 virtue of non-self features or inappropriate localization. The zinc-finger antiviral protein ZAP  
37 (also known as poly(ADP-ribose) polymerase 13 or PARP13) is one such sensor and selectively  
38 binds to viral messenger RNA or viral RNA genomes [1, 2]. The ZAP-bound RNA molecules  
39 are subjected to degradation, which consequently decreases production of viral proteins and  
40 suppresses virus replication. Depending on the virus, the action of ZAP can selectively suppress  
41 viral protein expression by up to 30-fold, while cellular protein expression levels remain largely  
42 unaffected [1].

43

44 ZAP has a modular organization and is expressed as two major isoforms called ZAP-L and ZAP-  
45 S, that arise from alternative splicing and are distinguished by the presence of a C-terminal  
46 PARP (poly(ADP-ribose) polymerase)-like domain (**Fig. 1a**). Both isoforms contain an N-  
47 terminal RNA-binding domain (RBD) with four zinc fingers (here termed Z1 to Z4) that bind to  
48 CpG dinucleotides in RNA [3, 4]. Vertebrate genomes are depleted of CpG content, and it is the  
49 relative scarcity of this dinucleotide in cellular RNA compared to susceptible viral RNA that  
50 explains selective ZAP-mediated degradation [5]. A truncated ZAP fragment (here called ZAP-  
51 N; **Fig. 1a**) that essentially consists of only the RBD is both necessary and sufficient for  
52 directing viral RNA degradation [1]. However, there are indications that other ZAP domains are  
53 also important for its antiviral function [6, 7].

54

55 In both ZAP-L and ZAP-S, the RBD is connected by a long linker segment to a fifth zinc finger  
56 (Z5) and two WWE domains (WWE1 and WWE2) (**Fig. 1a**). These additional ZAP domains  
57 have unknown function, but WWE domains in other proteins are reported to have a general role  
58 in binding to poly(ADP-ribose) (PAR) [8, 9]. PAR is a cellular polynucleotide that has been  
59 shown to function as a scaffold or collective docking site for multiple protein partners, thereby  
60 allowing for sustained co-localization of the components of cellular pathways [10, 11]. Here, we  
61 show that Z5, WWE1 and WWE2 are sub-domains or modules that integrate into a composite  
62 fold, which we term the ZAP central domain (ZAP-CD). Structural and biochemical analyses  
63 revealed that ZAP-CD binds to PAR through the second WWE module. Both ZAP [12-15] and  
64 PAR [16, 17] have been previously reported to localize to so-called RNA stress granules, which  
65 constitute a type of non-membranous cytoplasmic compartment that facilitates RNA turnover  
66 and antiviral responses [18, 19]. Our studies suggest that PAR may coordinate the stable co-  
67 localization of ZAP and its co-factors in stress granules and thereby facilitate efficient  
68 recognition and/or degradation of ZAP-bound RNA.

69

70

## 71 **Results**

72

### 73 **ZAP Z5, WWE1 and WWE2 form a single composite domain**

74

75 We first aimed to define a protein construct from the central regions of ZAP that could be  
76 characterized biochemically. The Z5, WWE1 and WWE2 modules were insoluble when  
77 individually overexpressed recombinantly in *E. coli*, but a ZAP construct spanning residues 498-

78 699 and containing all three was highly soluble and could be purified to homogeneity (**Fig. 1b**).  
79 The purified ZAP-CD protein exhibited a single folding transition in thermal melting  
80 experiments (**Fig. 1c**). We then determined the crystal structure of ZAP-CD to 2.5 Å resolution  
81 ( $R_{\text{work}}/R_{\text{free}} = 0.22/0.26$ ) (**Fig. 2a** and **Table 1**). The Z5, WWE1 and WWE2 modules each form a  
82 compact fold or sub-domain. Close packing between the three modules is mediated by well-  
83 ordered “linker” residues, which we term L2, L3 and L4 (colored in red, cyan and magenta in  
84 **Fig. 2a**); although separated in sequence these linkers come together in the middle of the  
85 structure and glue together the three sub-domains. Thus, the three modules or sub-domains of  
86 ZAP-CD are integrated into a composite fold that likely behaves as a single functional unit.  
87  
88 Examination of the surface features and electrostatic potential of ZAP-CD revealed two major  
89 regions of interest: a deep pocket in the second WWE module (**Fig. 2b**, top), which appeared  
90 suitable for binding an aromatic ligand (discussed in more detail below), and a deep cleft or ridge  
91 running along one side of the composite domain (**Fig. 2b**, bottom). A similar cleft was observed  
92 in the tandem WWE fold of Deltex, which was proposed to bind to extended polypeptide  
93 segments [20]. The highly electropositive nature of the cleft suggests that it may also be well  
94 suited to bind negatively-charged, non-proteinaceous polymers such as polynucleotides.

## 96 **ZAP-CD contains a putative high-affinity PAR binding site**

97  
98 The WWE domain was first described as an independent protein-folding module with a  
99 characteristic signature of conserved tryptophan, glutamate and arginine residues, and is found in  
100 many proteins that function in ubiquitination and PARylation pathways [8, 9]. In ZAP, the two

101 WWE modules share the same canonical  $\beta$ -strand/ $\alpha$ -helix fold as expected, but differ  
102 considerably with regards to the loops connecting the  $\beta$ -strands (compare **Fig. 3a** and **Fig. 3b**).  
103 In the second WWE module, the loops are more extended and generate the abovementioned  
104 pocket (**Fig. 3b**). The walls of the pocket are lined by hydrophobic sidechains (W611, Y621,  
105 Y659), and at the bottom of the pocket is a partially buried glutamine residue (Q668).  
106 Comparison of ZAP's second WWE module to that of the single WWE in RNF146 (an E3  
107 ubiquitin ligase involved in DNA repair) [21] (**Fig. 3c**) revealed that these pocket sidechains are  
108 highly conserved in both identity and three-dimensional configuration, suggesting a common  
109 function (**Fig. 3d**). In RNF146, the pocket is a nM-affinity binding site for *iso*(ADP-ribose), a  
110 repeating structural unit of PAR. In the RNF146 crystal structure with bound *iso*(ADP-ribose),  
111 the buried glutamine (Q153, equivalent to Q668 in ZAP) makes hydrogen bonds with the  
112 adenine ring of the ligand; a hydrophobic sidechain (Y107, equivalent to W611 in ZAP) makes a  
113 *pi*-stacking interaction with the same adenine ring [21]. Residues that mediate binding to the  
114 phosphate groups are likewise conserved or highly similar between ZAP and RNF146 (e.g.,  
115 R163 in RNF146 and K677 in ZAP) (**Fig. 3e**). In the case of ZAP-CD, the protein construct was  
116 crystallized without added ligand, but closer examination of the electron density maps within the  
117 pocket revealed well-defined residual difference densities (green and blue mesh in **Fig. 3b**),  
118 whose shapes were consistent with a bound adenine ring and a phosphate. Indeed, protein  
119 backbone-guided superposition of the ZAP-CD and RNF146 structures places the RNF146-  
120 bound *iso*(ADP-ribose) ligand precisely within these densities (**Fig. 3e**). This close  
121 correspondence indicates that, like RNF146, ZAP is a PAR-binding protein. Note that *iso*(ADP-  
122 ribose) does not naturally exist in cells and was originally synthesized as a reagent to establish  
123 the specificity determinant of RNF146 for PAR [21]. We surmise that some abundant small

124 molecule containing an adenine ring and phosphate groups (e.g., ATP, ADP-ribose or similar)  
125 co-purified and co-crystallized with our recombinant ZAP-CD protein (see also Materials and  
126 Methods). In any case, the important point is that the above analyses strongly indicated that, just  
127 like the RNF146 WWE domain, the second WWE module of ZAP binds PAR.

128

### 129 **ZAP-CD binds PAR *in vitro***

130

131 To directly test whether ZAP interacts with PAR, we enzymatically synthesized and purified  
132 PAR polymers *in vitro* [21, 22] (**Fig. 4a**). We prepared two forms of PAR, which we term ‘high-  
133 MW PAR’ and ‘low-MW PAR’ to reflect their elution behavior from a preparative sizing  
134 column (**Fig. 4b**) and electrophoretic migration in an agarose gel (**Fig. 4c**). Note that in both of  
135 these preparations the PAR polymers are heterogeneous in length and probably constitute both  
136 linear and branched forms.

137

138 We then used analytical size exclusion chromatography to test for a binding interaction (**Fig. 5a**).  
139 In this experiment, a positive interaction can be generally expected to manifest in one of two  
140 ways. High-affinity binding can result in formation of a stable complex that elutes with an  
141 apparent size (strictly speaking, hydrodynamic radius) greater than the early-eluting component.  
142 Less stable complexes can dissociate and exchange with the unbound components during the  
143 chromatography run to generate an elution profile in which the late-eluting component peak is  
144 smeared towards an earlier volume. Initially, we tested for binding between ZAP-CD and low-  
145 MW PAR. In control experiments, ZAP-CD alone eluted as a single peak from an analytical  
146 Superdex 200 column with an elution volume of ~18 mL (**Fig. 5a**, green curve). Low-MW PAR

147 eluted at an earlier volume of ~14.5 mL from the same column (**Fig. 5a**, black curve). When the  
148 two components were mixed prior to sample injection, both types of elution behavior described  
149 above were observed. The profile consisted of a peak with an elution volume of ~13.5 mL,  
150 which is earlier than either PAR or ZAP-CD alone and indicative of a stable complex; in  
151 addition, the trailing ZAP-CD peak was also smeared towards earlier elution volumes (**Fig. 5a**,  
152 orange curve). SDS-PAGE confirmed the presence of protein in all the relevant fractions (insets  
153 in **Fig. 5a**). These results show that ZAP-CD indeed binds PAR *in vitro*, and that furthermore,  
154 two types of ZAP-CD/PAR interactions can be discerned from the exchange behavior of the  
155 complexes during size exclusion chromatography.

156  
157 As described above, the ZAP-CD structure revealed a putative *iso*(ADP-ribose) binding pocket  
158 that contains a buried glutamine residue, Q668, surrounded by hydrophobic sidechains including  
159 W611 (**Fig. 3d**). To confirm the importance of this pocket for PAR binding, we purified and  
160 tested ZAP-CD proteins harboring W661A, Q668A or Q668R mutations for binding (**Fig. 1b**).  
161 The mutant proteins did not bind low-MW PAR as evidenced by the elution profiles of the mixed  
162 samples, which were simple sums of the profiles of the individual components (**Fig. 5b**). These  
163 results confirm that the shifts in elution volume observed in **Figure 5a** arise from specific  
164 interactions between ZAP-CD and PAR, and that these interactions involve binding of the  
165 *iso*(ADP-ribose) unit of PAR to the WWE pocket, analogous to RNF146. Furthermore, both the  
166 non-exchanging and exchanging ZAP-CD/low-MW PAR complexes require the *iso*(ADP-ribose)  
167 pocket.

168



169 We next tested binding of ZAP-CD to the high-MW PAR preparation. Mixing of protein and  
170 polynucleotide resulted in rapid solution turbidity, as evidenced by an increase in the solution  
171 light scattering signal as a function of incubation time (**Fig. 5c**). Negative stain electron  
172 microscopy revealed that the sample consisted of large globular particles around 100 nm in size  
173 (**Fig. 5d**). Given the polynucleotide nature of PAR, we expected these particles to have  
174 filamentous character, and indeed, the individual globules appear to be compacted filaments,  
175 although this requires further confirmation. Interestingly, the ZAP-CD/high-MW PAR particles  
176 are similar in size and appearance to PAR polymers and PARylated PARP enzymes observed in  
177 previous electron microscopy studies [23-25]. Our results suggest that ZAP and PAR may form  
178 higher-order complexes or assemblies in cells.

179

#### 180 **ZAP-CD binds PAR in cells**

181

182 To confirm that ZAP interacts with PAR in cells, we overexpressed HA-tagged ZAP proteins in  
183 HEK 293T cells and performed co-immunoprecipitation experiments (**Fig. 6**). HA-tagged ZAP-  
184 CD efficiently co-precipitated PAR from clarified cell lysates (**Fig. 6a**, lane 2). In contrast, ZAP-  
185 CD proteins harboring the Q668A or Q668R mutations in the putative *iso*(ADP-ribose) pocket  
186 did not co-precipitate PAR (**Fig. 6a**, lanes 3 and 4). Experiments performed with HA-tagged  
187 ZAP-L, a naturally-occurring full-length isoform of ZAP, likewise revealed that ZAP-L could  
188 co-precipitate PAR (**Fig. 6b**, lane 2). In contrast to the shorter ZAP-CD construct, however, the  
189 Q668A and Q668R ZAP-L mutants still co-precipitated PAR, although at appreciably lower  
190 amounts than wild type ZAP-L (**Fig. 6b**, compare lanes 3 and 4 with lane 2). These results  
191 indicate that the ZAP central domain indeed binds to PAR in cells as predicted by our structural

192 and biochemical analyses, but that other domains in ZAP-L may also independently associate  
193 with PAR (see Discussion).

194

195 PAR is ubiquitously found in cells but becomes enriched within non-membranous sub-cellular  
196 compartments called RNA stress granules upon stress induction or virus challenge. For example,  
197 treatment of cells with arsenite (which causes oxidative stress) induces PAR accumulation in  
198 stress granules [16]. We took advantage of this property to directly examine association of ZAP  
199 and PAR in the cellular setting. HA-tagged ZAP-CD was expressed in HeLa cells under  
200 conditions that allowed facile visualization of both ZAP-CD and PAR by immunofluorescence  
201 microscopy (**Fig. 7**). In untreated cells, both ZAP-CD and PAR showed diffuse staining (**Fig. 7a**,  
202 left panels). Upon treatment of the cells with 0.25 mM sodium arsenite, a fraction of the PAR  
203 staining redistributed into punctate accumulations (indicated by white arrows in **Fig. 7a**, right,  
204 middle panel) that were clearly distinguished from the diffuse background fraction. (Control  
205 experiments confirmed that these puncta also contained established stress granule markers.)  
206 Arsenite treatment also induced the redistribution of ZAP-CD (**Fig. 7a**, right, top), and  
207 importantly the punctate ZAP-CD accumulations co-localized with the PAR accumulations (**Fig.**  
208 **7a**, right, bottom). In contrast, the ZAP-CD Q668R mutant did not re-localize with PAR (**Fig.**  
209 **7b**). We therefore conclude that the ZAP central domain binds PAR, both *in vitro* and in cells.

210

### 211 **PAR-binding by the central domain potentiates ZAP antiviral activity**

212

213 Having established the biochemical properties of the ZAP central domain both *in vitro* and in  
214 cells, we next tested whether its PAR binding activity would affect ZAP's antiviral function

215 against CpG-enriched HIV-1. We used an engineered HIV-1 mutant, termed (NL4.3 CG-High),  
216 that was previously generated by synonymous mutagenesis to contain a higher number of CpGs  
217 compared to wild type HIV-1 [5]. ZAP directly binds to and directs the degradation of the CpG-  
218 rich viral RNA transcripts, thereby reducing viral protein synthesis and the yield of (NL4.3 CG-  
219 High) virus. We transfected ZAP-deficient HEK293T cells with proviral plasmids encoding wild  
220 type HIV-1 control (NL4.3 WT) or CpG-enriched virus (NL4.3 CG-High), together with varying  
221 amounts of expression vectors encoding either wild type ZAP-L or the ZAP-L Q668R mutant.  
222 Virus yields were measured 48 h after transfection. While both the wild type and CpG-enriched  
223 viruses gave similar yields in the absence of ZAP-L, progressively increasing the expression of  
224 ZAP-L resulted in corresponding reduction in the yield of infectious units of HIV-1 (NL4.3 CG-  
225 High) but not (NL4.3 WT) (**Fig. 8a**). Notably, the PAR-binding deficient ZAP-L mutant  
226 (Q668R) exhibited a 5- to 10-fold reduced antiviral potency when compared to wild type ZAP-L.  
227 The diminished antiviral activity was also reflected in the amount of Env protein synthesized in  
228 transfected cells (gp160 and gp120, **Fig. 8b**). These results confirm that the PAR-binding  
229 property of the central domain is not essential for ZAP-L-mediated inhibition of CpG-enriched  
230 HIV-1 replication. Nevertheless, loss of the ability to bind PAR correlated with an appreciable  
231 decrease in antiviral activity.

232

233

## 234 **Discussion**

235

236 While it is established that the N-terminal RBD of ZAP containing its first four zinc fingers is  
237 both necessary and sufficient to recognize CpG-rich viral RNA and direct their degradation, how

238 the downstream domains contribute to ZAP's antiviral function remains to be elucidated. Our  
239 structural and biochemical studies here reveal that the central regions of ZAP, comprising the  
240 fifth zinc finger and two WWE modules, integrate to form a single folded domain. This ZAP  
241 central domain displays an electropositive surface and features a prominent pocket in the second  
242 WWE module. Our data indicate that this pocket binds to the repeating *iso*(ADP-ribose) unit  
243 found in PAR. This work therefore provides further support for the idea that WWE domains have  
244 the general function of acting as PAR-binding modules [9, 21].

245  
246 How might PAR binding relate to ZAP's antiviral function? Being an extended polynucleotide,  
247 PAR chains have the requisite size and architecture to function as a polyvalent scaffold that  
248 facilitates clustering of binding partners [11, 26]. Multiple CpGs are required to target an mRNA  
249 strand for degradation and each ZAP RBD can only bind a single CpG dinucleotide, implying  
250 that selective recognition requires formation of a multivalent ZAP/mRNA complex [3-5]. Thus, a  
251 simple model is that PAR binding by ZAP can facilitate recognition and subsequent RNA  
252 processing by promoting local clustering of the protein molecules and thereby shifting the  
253 interaction equilibria to favor association. It is possible that such an affinity amplification  
254 mechanism may become more acutely important in certain contexts, for example when pathway  
255 components are limiting or when viral RNA levels are low.

256  
257 Alternatively, PAR binding may be a means to regulate ZAP's sub-cellular distribution. PAR is  
258 critical for the formation and maintenance of RNA stress granules [16]. ZAP is diffusely  
259 cytoplasmic, but upon viral infection is localized to stress granules [15]. ZAP was also identified  
260 as a component of granules induced by oxidative stress [27]. Similarly, at least one ZAP co-

261 factor, TRIM25, has been reported to be associated with stress granules [27-29]. Although it  
262 remains to be established whether stress granules are the actual site of antiviral activity, it was  
263 recently reported that differential access of the long and short ZAP isoforms to target mRNA  
264 populations is regulated by sub-cellular localization [30]. Specifically, ZAP-L is targeted to  
265 intracellular compartments by a C-terminal posttranslational modification (prenylation [31])  
266 where it can access viral mRNA, whereas ZAP-S lacks this targeting signal and remains  
267 cytosolic where it accesses a different pool of cellular mRNA [30]. Both forms of ZAP contain  
268 the central domain, and thus, binding of this domain to PAR may be an additional mechanism to  
269 regulate where and when ZAP engages its targets. It is important to note, however, that the RBD  
270 (or ZAP-N) can independently associate with stress granules [15], although it is not clear  
271 whether this occurs through direct PAR binding by the RBD or indirectly through bound RNA.  
272 Indeed, our data indicate that loss of the central domain's PAR-binding activity only reduces –  
273 and does not eliminate – ZAP-L's ability to inhibit virus replication. Thus, the PAR-binding  
274 function of the central domain is an ancillary activity that contributes to the overall efficiency of  
275 viral RNA recognition and degradation.

276

277

## 278 **Materials and Methods**

279

### 280 **Plasmids**

281

282 ZAP-L was obtained from Addgene (plasmid #45907). ZAP-CD was generated by using primers  
283 containing a Kozak sequence and an N-terminal HA tag, and inserted into pCDNA3-MCS

284 between the EcoRI and NotI sites. ZAP mutants (W611A, Q668A, and Q668R) were generated  
285 by using the QuikChange Lightning site-directed mutagenesis kit (Agilent Technologies). *E. coli*  
286 expression plasmids were generated by sub-cloning from the Addgene plasmid using Gibson  
287 assembly. All coding sequences were confirmed by DNA sequencing.

288

### 289 **ZAP-CD purification, crystallization and structure determination**

290

291 ZAP-CD was expressed with a His<sub>6</sub>-SUMO leader sequence in *E. coli* BL21(DE3) cells by using  
292 the autoinduction method [32]. The His-tagged fusion protein was purified by using Ni-NTA  
293 chromatography, the tag was removed with Ulp1 protease, and the untagged ZAP-CD protein  
294 was purified to homogeneity using anion exchange chromatography. The protein was exchanged  
295 into storage buffer (20 mM Tris, pH 8, 100 mM NaCl, 1 mM TCEP) by using preparative size  
296 exclusion or dialysis.

297

298 Crystallization was performed in sitting drops, by mixing protein and precipitant (0.8-1.1 M  
299 sodium nitrate, 0.1 M sodium acetate, pH 4.8-6.0) at a volume ratio of 3:1. Crystals were cryo-  
300 protected in 20% PEG 400 and diffraction data were collected at the Advanced Photon Source  
301 beamline 22-ID. The structure was solved by single anomalous diffraction methods from a  
302 selenomethione dataset, and the data quality was sufficiently high to permit automatic model  
303 building by PHENIX software [33] directly from integrated data with only some manual  
304 rebuilding required. Structure statistics are summarized in **Table 1**. At the completion of  
305 structure refinement, weak but clear difference density was observed in the second WWE  
306 domain, suggesting that some small molecule had co-purified and co-crystallized with ZAP-CD.

307 Indeed, the  $A_{260}/A_{280}$  ratios of purified samples were  $\sim 0.6-0.7$ , indicating the presence of low  
308 levels of some  $A_{260}$ -absorbing component. However, it was clear that only a small fraction of the  
309 protein was bound, because the co-purifying small molecule was not detected by mass  
310 spectrometry analysis of the sample used for crystallization. It appears that this bound fraction  
311 was the one that crystallized, because the crystals were very sparse and small.

312

### 313 **Differential scanning fluorimetry**

314

315 Thermal melting profiles were measured by using a Tycho (NanoTemper), following the  
316 manufacturer's instructions.

317

### 318 **Preparation of PAR**

319

320 PAR was enzymatically prepared as previously described [22].

321

### 322 **Size exclusion binding assay**

323

324 Size exclusion was performed in 20 mM Tris, pH 8, 100 mM NaCl, 1 mM TCEP. Four  $A_{280}$   
325 absorbance units of ZAP-CD ( $77 \mu\text{M}$ ) was mixed with equal volume of four  $A_{260}$  absorbance  
326 units of PAR ( $296 \mu\text{M}$  in terms of ADP-ribose subunits), incubated for 20 min at room  
327 temperature, and then injected on a Superdex 200 30/100 column and developed at a flow rate of  
328  $0.5 \text{ mL/min}$  at room temperature. For control injections, ZAP-CD or PAR was mixed with buffer  
329 alone.

330

### 331 **Negative stain electron microscopy**

332

333 Samples (3  $\mu$ L) were onto the carbon side of carbon-coated copper grids (Electron Microscopy  
334 Sciences) for 90 s, rinsed for 90 s by flotation on a drop of water, blotted dry, stained for 90 s by  
335 floating on a drop of 2% (*w/v*) solution of uranyl acetate, blotted dry, and allowed to air dry.  
336 Images were viewed on an FEI Tecnai Spirit transmission electron microscope operating at 120  
337 kV.

338

### 339 **Cells and plasmid transfections**

340

341 HEK 293T and HeLa cell lines were maintained in DMEM supplemented with 10% FBS (fetal  
342 bovine serum), 100 U/mL penicillin, and 100  $\mu$ g/mL streptomycin. Transfections were  
343 performed by using Hilymax (Dojindo Molecular Technologies) according to the manufacturer's  
344 instructions.

345

### 346 **Immunoprecipitation and immunoblotting**

347

348 At 48 h after transfection, HEK 293T cells were washed twice with PBS (phosphate-buffered  
349 saline) and lysed in IP buffer (50 mM Tris, pH 7.5, 150 mM NaCl, 0.2% Triton X-100)  
350 containing 1  $\mu$ M ADP-HPD (Millipore) and cOmplete Mini EDTA-free inhibitor (Roche) for 20  
351 min (with rotation at 4  $^{\circ}$ C). The lysate was clarified by centrifugation at 4  $^{\circ}$ C for 15 min at  
352 18,800  $\times$ g. A final concentration of 10  $\mu$ g/mL cytochalasin B (Sigma) and 25  $\mu$ M nocodazole



353 (Sigma) were then added to the supernatant. Samples were then mixed with either anti-HA  
354 magnetic beads (Thermoscientific) or protein G magnetic beads (Thermoscientific) coupled with  
355 anti-pADPr (Abcam) (beads were pre-blocked with 1% BSA). After overnight incubation at 4  
356 °C, the beads were washed 4 times with IP buffer, re-suspended in SDS loading buffer, boiled  
357 for 5 min, electrophoresed on a Novex 4-20% Tris-Glycine mini-gel (Invitrogen), and then  
358 transferred onto PVDF membranes. Mouse anti-poly(ADP-ribose) polymer [10H] (1:1000;  
359 Abcam), mouse anti-HA [F-7] (1:3000; Santa Cruz), mouse anti- $\beta$ -Actin [C4] (1:3000; Santa  
360 Cruz), and HRP-conjugated goat antibody to mouse (1:10,000; Azure Biosystems) were used for  
361 detection.

362

### 363 **Immunostaining and fluorescence microscopy**

364

365 At 24 h after transfection, HeLa cells were treated with or without 250  $\mu$ M sodium arsenate for  
366 30 min. HeLa cells on coverslips were washed twice in PBS and fixed for 15 min in 4%  
367 paraformaldehyde and then permeabilized with 0.5% Triton X-100. Coverslips were washed  
368 three times in PBS, then blocked with 3% BSA in TBST (Tris-buffered saline supplemented with  
369 0.05% Tween 20) for 30 min. Cells were incubated with primary antibodies at room temperature  
370 for 1 h, and then with Alexa-Fluor-conjugated secondary antibodies and Hoechst 33342  
371 (ThermoFisher) at RT for 30 min. Coverslips were mounted on glass slides with ProLong Gold  
372 antifade solutions (Molecular Probes). Mouse monoclonal anti-poly(ADP-ribose) polymer [10H]  
373 (1:50; Abcam) and rabbit monoclonal anti-HA [C29F4] (1:500, Cell Signaling) were used as  
374 primary antibodies. Secondary antibodies were donkey anti-mouse IgG H&L Alexa Fluor 647  
375 (1:500; Abcam) and donkey anti-rabbit IgG H&L Alexa Fluor 488 (1:500; Abcam).

376 Microscopy was performed by using an LSM 880 confocal laser scanning microscope (Zeiss)  
377 with a 63× oil immersion objective (NA 1.4) and Zen imaging software (Zeiss). Images were  
378 collected simultaneously using the 405, 488 and 633 nm excitation laser lines.

379

### 380 **Antiviral activity assays**

381

382 HEK 293T *ZAP*<sup>-/-</sup> *TRIM25*<sup>-/-</sup> cells were transfected with proviral plasmids of either wild type  
383 HIV-1 or a CpG-enriched mutant (NL4-3) [5], together with a plasmid encoding TRIM25 and  
384 increasing concentrations of a plasmid encoding wild type ZAP-L or mutant ZAP-L (Q668R).  
385 Cells were incubated for 48 h at 37 °C. Produced virus was then harvested, filtered and titered on  
386 MT4-GFP cells to determine infectious units per mL. Statistical significance was assessed using  
387 multiple *t*-tests (wild type ZAP-L versus Q668R ZAP-L, wild type and CpG-enriched NL4.3  
388 viruses, corrected for multiple comparisons using the Holm-Sidak method) and two-way  
389 ANOVA.

390

392 **Acknowledgements**

393

394 We thank Jacint Sanchez for Jonathan Wagner assistance and advice with protein purification,

395 crystallization and diffraction data collection. This work was funded by National Institutes of

396 Health Grants R01-AI150479 (O.P.), U54-AI150470 (O.P., B.K.G.-P. and P.D.B.) and R01-

397 AI150111 (P.D.B.).

398

399 **References**

- 400 1. Gao G, Guo X, Goff SP. Inhibition of retroviral RNA production by ZAP, a CCCH-type  
401 zinc finger protein. *Science*. 2002;297(5587):1703-1706.
- 402 2. Guo X, Carroll JW, Macdonald MR, Goff SP, Gao G. The zinc finger antiviral protein  
403 directly binds to specific viral mRNAs through the CCCH zinc finger motifs. *J Virol*.  
404 2004;78(23):12781-12787.
- 405 3. Meagher JL, Takata M, Goncalves-Carneiro D, Keane SC, Rebendenne A, Ong H, et al.  
406 Structure of the zinc-finger antiviral protein in complex with RNA reveals a mechanism for  
407 selective targeting of CG-rich viral sequences *Proc Natl Acad Sci U S A*. 2019;116(48):24303-  
408 24309.
- 409 4. Luo X, Wang X, Gao Y, Zhu J, Liu S, Gao G, et al. Molecular mechanism of RNA  
410 recognition by Zinc-finger Antiviral Protein. *Cell Rep*. 2020;30(1):46-52.
- 411 5. Takata MA, Goncalves-Carneiro D, Zang TM, Soll SJ, York A, Blanco-Melo D, et al.  
412 CG dinucleotide suppression enables antiviral defence targeting non-self RNA. *Nature*.  
413 2017;550:124-127.
- 414 6. Kerns JA, Emerman M, Malik HS. Positive selection and increased antiviral activity  
415 associated with the PARP-containing isoform of human zinc-finger antiviral protein. *PLoS*  
416 *Genet*. 2008;4(1):e21.
- 417 7. Daugherty MD, Young JM, Kerns JA, Malik HS. Rapid evolution of PARP genes  
418 suggests a broad role for ADP-ribosylation in host-virus conflicts. *PLoS Genet*.  
419 2014;29(5):e1004403.
- 420 8. Aravind L. The WWE domain: a common interaction module in protein ubiquitination  
421 and ADP ribosylation. *Trends Biochem Sci*. 2001;26(5):273-275.

- 422 9. Wang Z, Michaud GA, Cheng Z, Zhang Y, Hinds TR, Fan E, et al. Recognition of the  
423 iso-ADP-ribose moiety in poly(ADP-ribose) by WWE domains suggests a general mechanism  
424 for poly(ADP-ribosyl)ation-dependent ubiquitination. *Genes Dev.* 2012;26(3):235-240.
- 425 10. Krietsch J, Rouleau M, Pic E, Ethier C, Dawson TM, Dawson VL, et al. Reprogramming  
426 cellular events by poly(ADP-ribose)-binding proteins. *Mol Aspects Med.* 2013;34(6):1066-1087.
- 427 11. Leung AKL. Poly(ADP-ribose): a dynamic trigger for biomolecular condensate  
428 formation *Trends Cell Biol.* 2020;30(5):370-383.
- 429 12. Lee H, Komano J, Saitoh Y, Yamaoka S, Kozaki T, Misawa T, et al. Zinc-finger antiviral  
430 protein mediates retinoic acid inducible gene I-like receptor-independent antiviral response to  
431 murine leukemia virus. *Proc Natl Acad Sci U S A.* 2013;110(30):12379-12384.
- 432 13. Goodier JL, Pereira GC, Cheung LE, Rose RJ, Kazazian HH, Jr. The broad-spectrum  
433 antiviral protein ZAP restricts human retrotransposition. *PLoS Genet.* 2015;11(5):e1005252.
- 434 14. Moldovan JB, Moran JV. The zinc-finger antiviral protein ZAP inhibits LINE and Alu  
435 retrotransposition *PLoS Genet.* 2015;11(5):e1005121.
- 436 15. Law LMJ, Razooky BS, Li MMH, You S, Jurado A, Rice CM, et al. ZAP's stress granule  
437 localization is correlated with its antiviral activity and induced by virus replication. *PLoS*  
438 *Pathog.* 2019;15(5):e1007798.
- 439 16. Leung AKL, Vyas S, Rood JE, Bhutkar A, Sharp PA, Chang P. Poly(ADP-ribose)  
440 regulates stress responses and microRNA activity in the cytoplasm *Mol Cell.* 2011;42(4):489-  
441 499.
- 442 17. Leung A, Todorova T, Ando Y, Chang P. Poly(ADP-ribose) regulates post-  
443 transcriptional gene regulation in the cytoplasm. *RNA Biol.* 2012;9(5):542-548.

- 444 18. Onomoto K, Yoneyama M, Fung G, Kato H, Fujita T. Antiviral innate immunity and  
445 stress granule responses. *Trends Immunol.* 2014;35(9):420-428.
- 446 19. Protter DSW, Parker R. Principles and properties of stress granules. *Trends Cell Biol.*  
447 2016;26(9):668-679.
- 448 20. Zweifel ME, Leahy DJ, Barrick D. Structure and Notch receptor binding of the tandem  
449 WWE domain of Deltex Structure. 2005;13(11):1599-15611.
- 450 21. DaRosa PA, Wang Z, Jiang X, Pruneda JN, Cong F, Klevit RE, et al. Allosteric activation  
451 of the RNF146 ubiquitin ligase by a poly(ADP-ribosyl)ation signal *Nature.* 2015;517(7533):223-  
452 226.
- 453 22. Wang Z, Xu W. Biochemical and biophysical assays of PAR-WWE domain interactions  
454 and production of iso-ADPr for PAR-binding analysis. *Methods Mol Biol.* 2018;1813:65-73.
- 455 23. de Murcia G, Jongstra-Bilen J, Ittel M-E, Mandel P, Delain E. Poly(ADP-ribose)  
456 polymerase auto-modification and interaction with DNA: electron microscopic visualization.  
457 *EMBO J.* 1983;2(4):543-548.
- 458 24. Hayashi K, Tanaka M, Shimada T, Miwa M, Sugimura T. Size and shape of poly(ADP-  
459 ribose): examination by gel filtration, gel electrophoresis and electron microscopy. *Biochem*  
460 *Biophys Res Commun.* 1983;112(1):102-107.
- 461 25. Sukhanova MV, Abrakhi S, Joshi V, Pastre D, Kutuzov MM, Anarbaev RO, et al. Single  
462 molecule detection of PARP1 and PARP2 interaction with DNA strand breaks and their  
463 poly(ADP-ribosyl)ation using high-resolution AFM imaging. *Nucleic Acids Res.*  
464 2015;44(6):e60.
- 465 26. Leung AKL. Poly(ADP-ribose): an organizer of cellular architecture. *J Cell Biol.*  
466 2014;205(5):613-619.

- 467 27. Jain S, Wheeler JR, Walters RW, Agrawal A, Barsic A, Parker R. ATPase-modulated  
468 stress granules contain a diverse proteome and substructure. *Mol Cell*. 2016;164:487-498.
- 469 28. Sanchez-Aparicio MT, Ayllon J, Leo-Macias A, Wolff T, García-Sastre A. Subcellular  
470 localizations of RIG-I, TRIM25, and MAVS complexes. *J Virol*. 2017;91(2):e01155-16.
- 471 29. Sanchez JG, Sparrer KMJ, Chiang C, Reis RA, Chiang JJ, Zurenski MA, et al. TRIM25  
472 Binds RNA to Modulate Cellular Anti-viral Defense. *J Mol Biol*. 2018;430(24):5280-5293.
- 473 30. Schwerk J, Soveg FW, Ryan AP, Thomas KR, Hatfield LD, Ozarkar S, et al. RNA-  
474 binding protein isoforms ZAP-S and ZAP-L have distinct antiviral and immune resolution  
475 functions. *Nat Immunol*. 2019;20:1610-1620.
- 476 31. Charron G, Li MM, MacDonald MR, Hang HC. Prenylome profiling reveals S-  
477 farnesylation is crucial for membrane targeting and antiviral activity of ZAP long-isoform. *Proc*  
478 *Natl Acad Sci U S A*. 2013;110:11085-11090.
- 479 32. Studier FW. Protein production by auto-induction in high density shaking cultures.  
480 *Protein Expr Purif*. 2005;41(1):207-234.
- 481 33. Adams PD, Afonine PV, Bunkoczi G, Chen VB, Davis IW, Echols N, et al. PHENIX: a  
482 comprehensive Python-based system for macromolecular structure solution. *Acta Crystallogr D*  
483 *Biol Crystallogr*. 2010;66(Pt 2):213-221.

484

485 **Table 1. Crystallographic statistics**

| <b>SeMet ZAP-CD</b>                                 |                                                                                                         |
|-----------------------------------------------------|---------------------------------------------------------------------------------------------------------|
| <b>Diffraction Data</b>                             |                                                                                                         |
| Beamline                                            | APS 22ID                                                                                                |
| File root                                           | ID22_032818_pck4pn2_SeMetZAP11                                                                          |
| Wavelength (Å)                                      | 0.97856                                                                                                 |
| Processing program                                  | HKL2000                                                                                                 |
| Space group                                         | P321                                                                                                    |
| Cell dimensions                                     | $a = b = 89.637 \text{ \AA}, c = 53.055 \text{ \AA}$<br>$\alpha = \beta = 90^\circ, \gamma = 120^\circ$ |
| Resolution range, Å                                 | 50-2.50 (2.54-2.50)                                                                                     |
| $R_{\text{sym}} / R_{\text{meas}} / R_{\text{pim}}$ | 0.14 (1) / 0.18 (1) / 0.03 (0.24)                                                                       |
| CC1/2                                               | 0.998 (0.893)                                                                                           |
| Mean $I/\sigma\langle I \rangle$                    | 24.2 (5.0)                                                                                              |
| Completeness, %                                     | 99.5 (100)                                                                                              |
| Average redundancy                                  | 48.0 (24.1)                                                                                             |
| Wilson B-factor, Å <sup>2</sup>                     | 35.6                                                                                                    |
| <b>SAD Phasing</b>                                  |                                                                                                         |
| Phasing program                                     | PHENIX (phenix.autosol)                                                                                 |
| No. of Se sites                                     | 5                                                                                                       |
| Figure of merit                                     | 0.38                                                                                                    |
| <b>Refinement Statistics</b>                        |                                                                                                         |
| Refinement program                                  | PHENIX (phenix.refine)                                                                                  |
| Resolution range                                    | 39-2.50 (2.70-2.50)                                                                                     |
| No. of unique reflections                           | 8,296 (1,701)                                                                                           |
| Reflections in free set                             | 428 (89)                                                                                                |
| $R_{\text{work}} / R_{\text{free}}$                 | 0.22 (0.26) / 0.26 (0.29)                                                                               |
| No. of nonhydrogen atoms                            |                                                                                                         |
| protein                                             | 1,447                                                                                                   |
| zinc                                                | 1                                                                                                       |
| water                                               | 33                                                                                                      |
| Average B-factor (Å <sup>2</sup> )                  |                                                                                                         |
| protein                                             | 42.1                                                                                                    |
| zinc                                                | 43.2                                                                                                    |
| water                                               | 34.7                                                                                                    |
| Coordinate deviations                               |                                                                                                         |
| bond lengths, Å                                     | 0.003                                                                                                   |
| bond angles, °                                      | 0.530                                                                                                   |
| <b>Validation and Deposition</b>                    |                                                                                                         |
| Ramachandran plot                                   |                                                                                                         |
| favored, %                                          | 97.8                                                                                                    |
| outliers, %                                         | 0                                                                                                       |
| MolProbity clashscore                               | 0.71                                                                                                    |
| PDB ID                                              | 7KZH                                                                                                    |

Values in parenthesis are for the highest resolution shell.

486  
487  
488



## 489 Figure Captions

490  
491 **Fig. 1.** Modular domain organization of ZAP. **(a)** Domain diagram of the ZAP primary sequence.  
492 Modules are colored according to their structural properties (zinc fingers Z1, Z2, Z3, Z4 and Z5  
493 in blue; WWE1 and WWE2 domains in orange; PARP in green; inter-domain linkers L1, L2, L3,  
494 and L4 in gray, red, cyan and magenta). Indicated below are the two major naturally-occurring  
495 splice isoforms (ZAP-L and ZAP-S), the minimally active antiviral fragment (ZAP-N) [1], and  
496 the central domain described in this study (ZAP-CD). **(b)** SDS-PAGE profiles of purified  
497 recombinant ZAP-CD proteins used in this study. **(c)** Differential scanning fluorimetry profile of  
498 wild type (WT) ZAP-CD shows a single transition. The apparent melting temperature ( $T_m$ ) is  
499  $50.9 \pm 0.1$  °C (determined with five independent protein preparations).

500  
501 **Fig. 2.** Crystal structure of ZAP-CD. **(a)** Ribbons representation. Modules are colored according  
502 to **Figure 1a** (Z5 in blue, WWE1 and WWE2 in orange), as are the linkers (L2 in red, L3 in  
503 cyan, and L4 in magenta). The amino and carboxyl termini are also indicated. Dashed black lines  
504 denote a disordered loop in the second WWE module. **(b)** Orthogonal surface views colored  
505 according to electrostatic potential from red (negative) to blue (positive). The Z5, WWE1 and  
506 WWE2 modules are indicated, as are the putative *iso*(ADP-ribose) pocket (top) and the extended  
507 electropositive cleft (bottom).

508  
509 **Fig. 3.** Structural analysis of the WWE modules. **(a-c)** Comparison of ZAP WWE1 (a), ZAP  
510 WWE2 (b) and RNF146 WWE with bound *iso*(ADP-ribose) ligand (PDB 4QPL) [21] (c). The  
511 three structures are shown in the same orientation. **(d)** Backbone-guided superposition of the  
512 *iso*(ADP-ribose) binding pockets in ZAP-CD (orange) and RNF146 (gray). Equivalent  
513 sidechains surrounding the pocket are shown explicitly and labeled. **(e)** Same superposition as  
514 (d) but showing only the residual difference densities observed in the ZAP-CD structure and the  
515 *iso*(ADP-ribose) ligand in the RNF146 structure. Note the excellent shape and positional  
516 matches to the adenine ring and one of the two phosphate groups. Green mesh in (b) and (e)  
517 represents unbiased  $mF_o - DF_c$  density contoured at  $2\sigma$ ; blue mesh represents  $2mF_o - DF_c$  density  
518 contoured at  $1\sigma$ .

519  
520 **Fig. 4.** Synthesis and preparation of PAR. **(a)** Histones were PARylated by incubation with  
521 recombinant PARP1 enzyme and  $NAD^+$  [22]. After proteolytic digestion to remove the proteins,  
522 released PAR polymers were purified by isopropanol precipitation. **(b)** Size exclusion profile on  
523 a preparative Superdex 200 column, after resuspension of the isopropanol precipitate. **(c)**  
524 Agarose gel electrophoresis profiles of the indicated fractions. Note that even though the ‘low-  
525 MW’ fraction appears as a single band, it is still a mixture of different lengths (and likely  
526 includes branched forms) of PAR.

527  
528 **Fig. 5.** ZAP-CD binds to PAR *in vitro*. **(a)** Size exclusion binding assay with purified ZAP-CD  
529 and low-MW PAR. The three top panels show individual analytical Superdex 200 size exclusion  
530 profiles of purified PAR alone (black), ZAP-CD alone (green) and mixed ZAP-CD and PAR  
531 after 20 min incubation (orange). The bottom panel shows an overlay of all three curves. Insets  
532 show SDS-PAGE analysis of fractions indicated in the bottom panel. Results are representative  
533 of two independent experiments, each done in two replicates. **(b)** Representative results of assays  
534 performed with low-MW PAR and the indicated ZAP-CD mutants. Results are representative of

535 two independent experiments. **(c)** Light scattering of a binding reaction containing ZAP-CD and  
536 high-MW PAR as a function of incubation time. Error bars indicate the standard deviation of  
537 three independent measurements. **(d)** Negative stain electron microscopy image of ZAP-  
538 CD/high-MW PAR complexes (20 min time point in c). Scale bar, 100 nm.

539

540 **Fig. 6.** PAR co-immunoprecipitates with ZAP. **(a-b)** HEK 293T cells were transfected with  
541 empty vector or the indicated HA-tagged ZAP-CD constructs (a) or ZAP-L constructs (b). Forty-  
542 eight hours later, whole cell lysates (WCL) were subjected to pull-down with anti-HA antibody  
543 followed by immunoblotting with the indicated antibodies. Actin was used as loading control.  
544 Results are representative of three (ZAP-CD) or two (ZAP-L) independent experiments.

545

546 **Fig. 7.** ZAP co-localizes with PAR in cytoplasmic puncta. HeLa cells were transiently  
547 transfected with **(a)** vector encoding HA-tagged ZAP-CD, **(b)** vector encoding HA-tagged ZAP-  
548 CD Q668R mutant, or **(c)** empty vector control. Twenty-four hours later, cells were treated with  
549 sodium arsenite or mock-treated, fixed, immunostained with anti-HA and anti-PAR primary  
550 antibodies followed by dye-conjugated secondary antibodies, and imaged by using fluorescence  
551 microscopy. Results are representative of two independent experiments.

552

553 **Fig. 8.** Antiviral potency of ZAP-L is reduced by the Q668R mutation. **(a)** HEK 293T *ZAP*<sup>-/-</sup>  
554 *TRIM25*<sup>-/-</sup> cells were transfected with a provirus of either HIV-1 (NL4.3 WT) control or a CpG-  
555 enriched mutant (NL4.3 CG-High), together with a plasmid encoding TRIM25 and increasing  
556 concentrations of a plasmid encoding WT ZAP-L or the ZAP-L Q668R mutant. After 48 hours,  
557 produced virus was harvested, filtered and titered. \*, indicates p<0.05; ns, not significant. **(b)**  
558 Immunoblots of whole cell lysates showing expression levels of HIV-1 proteins (gp160 and  
559 gp120) and ZAP-L. Tubulin was used as loading control. Results are representative of two  
560 independent experiments.

561

(a)

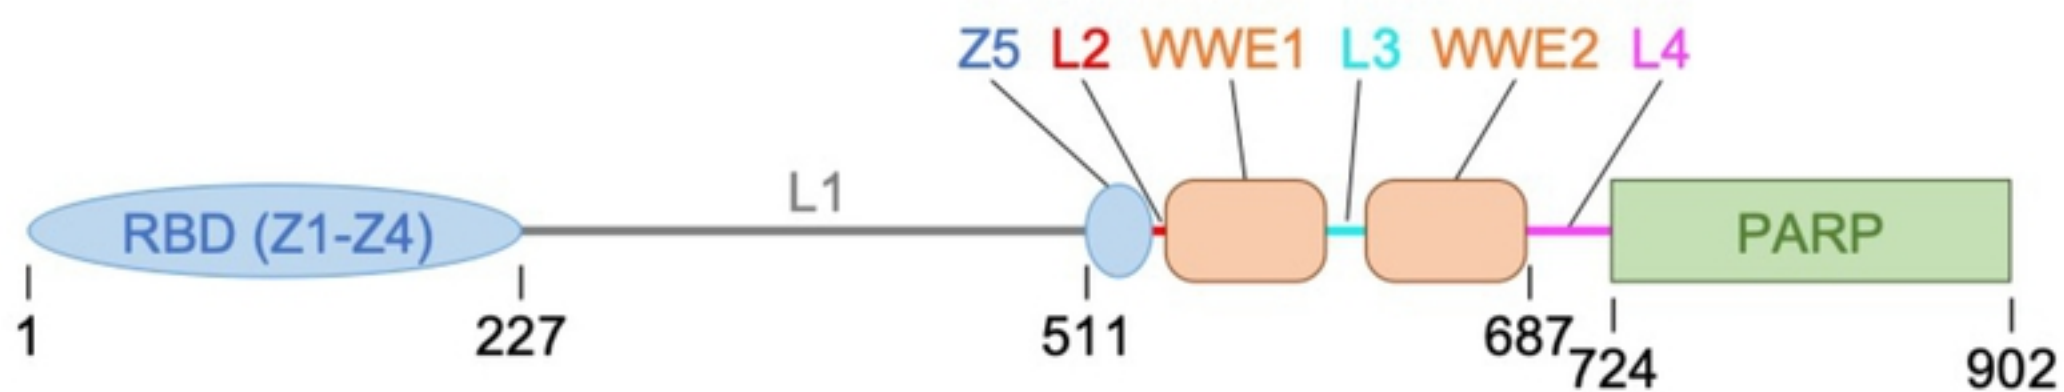

ZAP-L

bioRxiv preprint doi: <https://doi.org/10.1101/2020.12.17.423219>; this version posted December 17, 2020. The copyright holder for this preprint (which was not certified by peer review) is the author/funder, who has granted bioRxiv a license to display the preprint in perpetuity. It is made available under aCC-BY 4.0 International license.

ZAP-S

ZAP-N

ZAP-CD

(b)

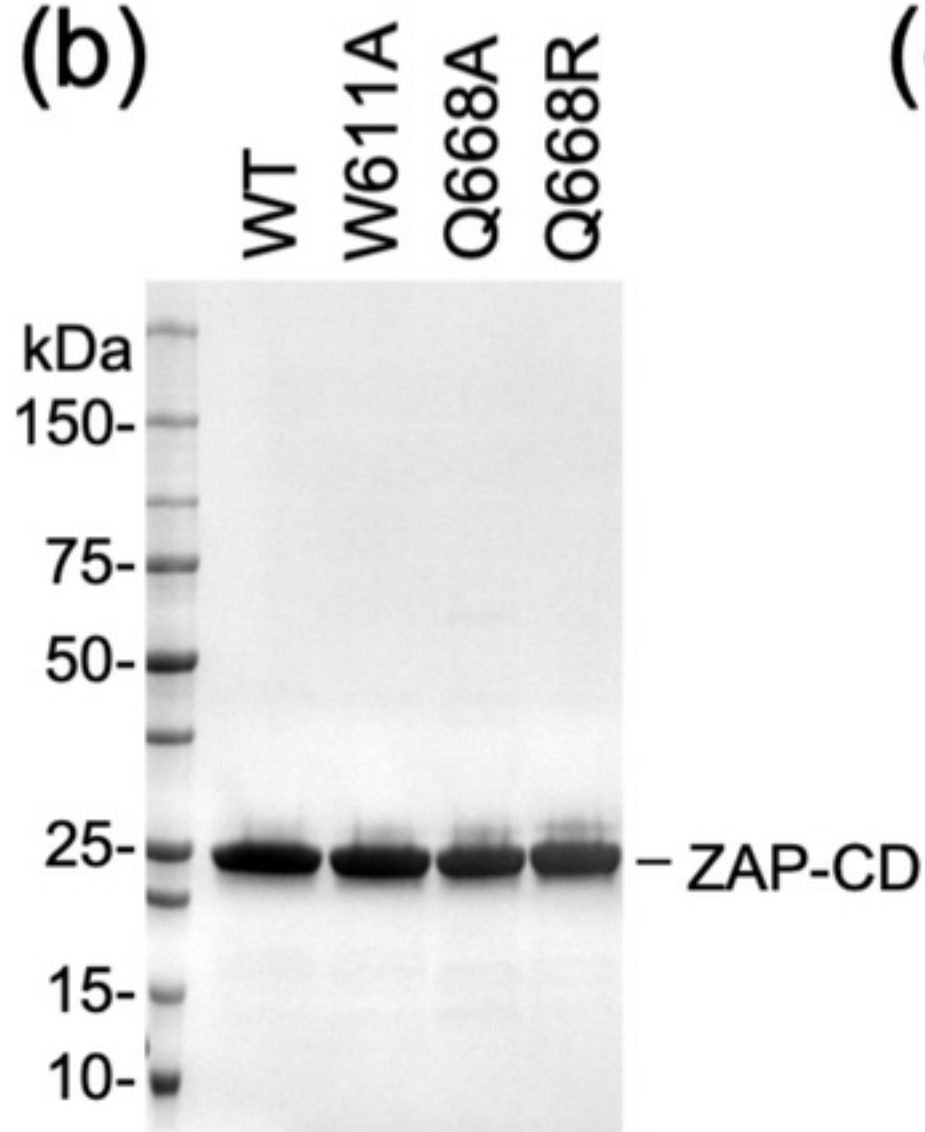

(c)

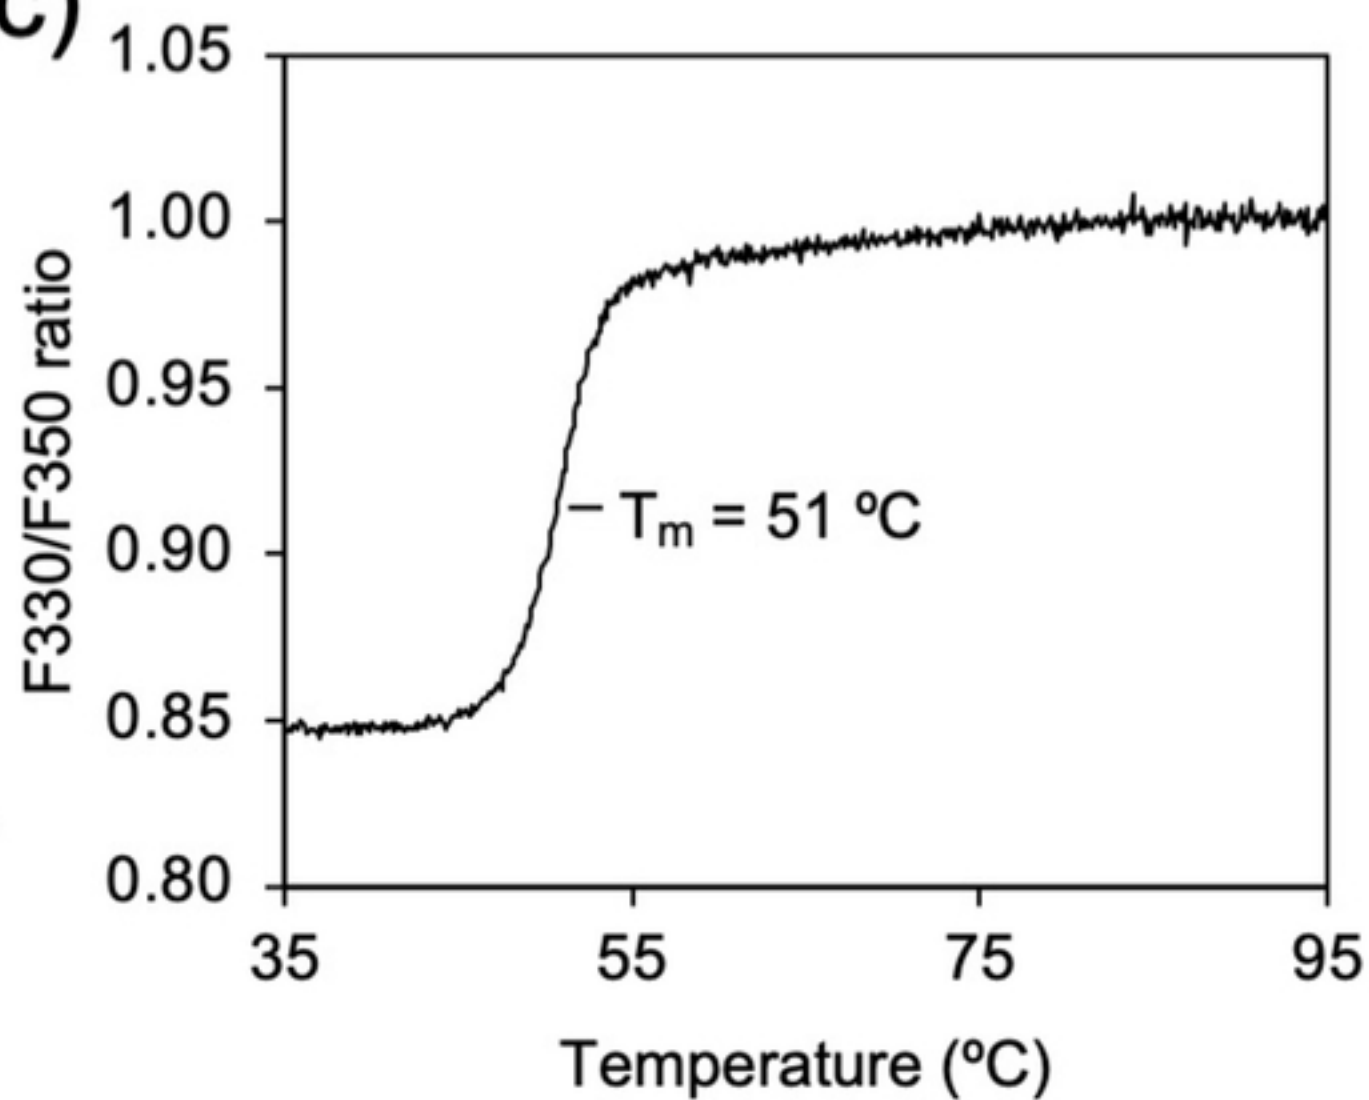

(a)

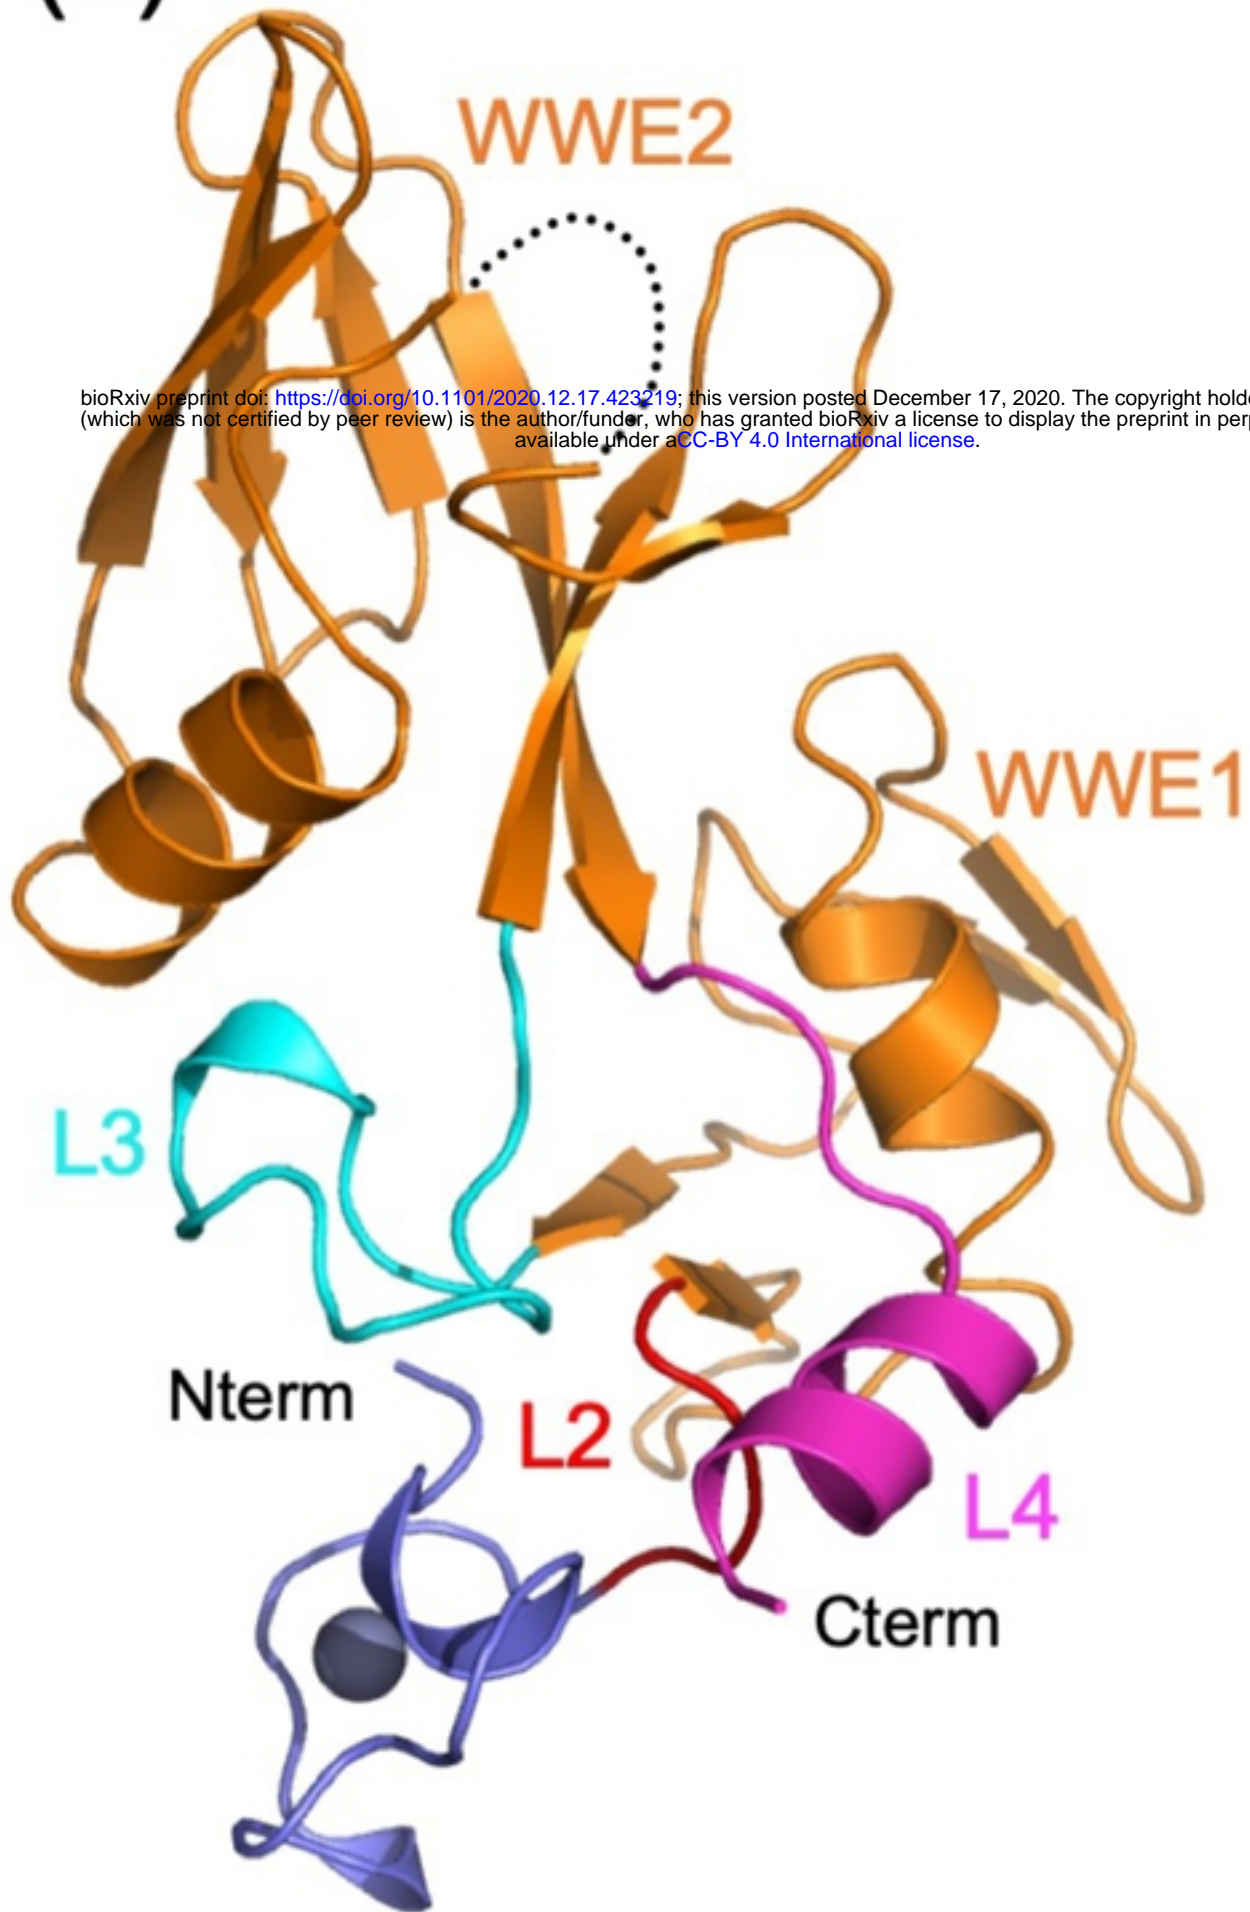

(b)

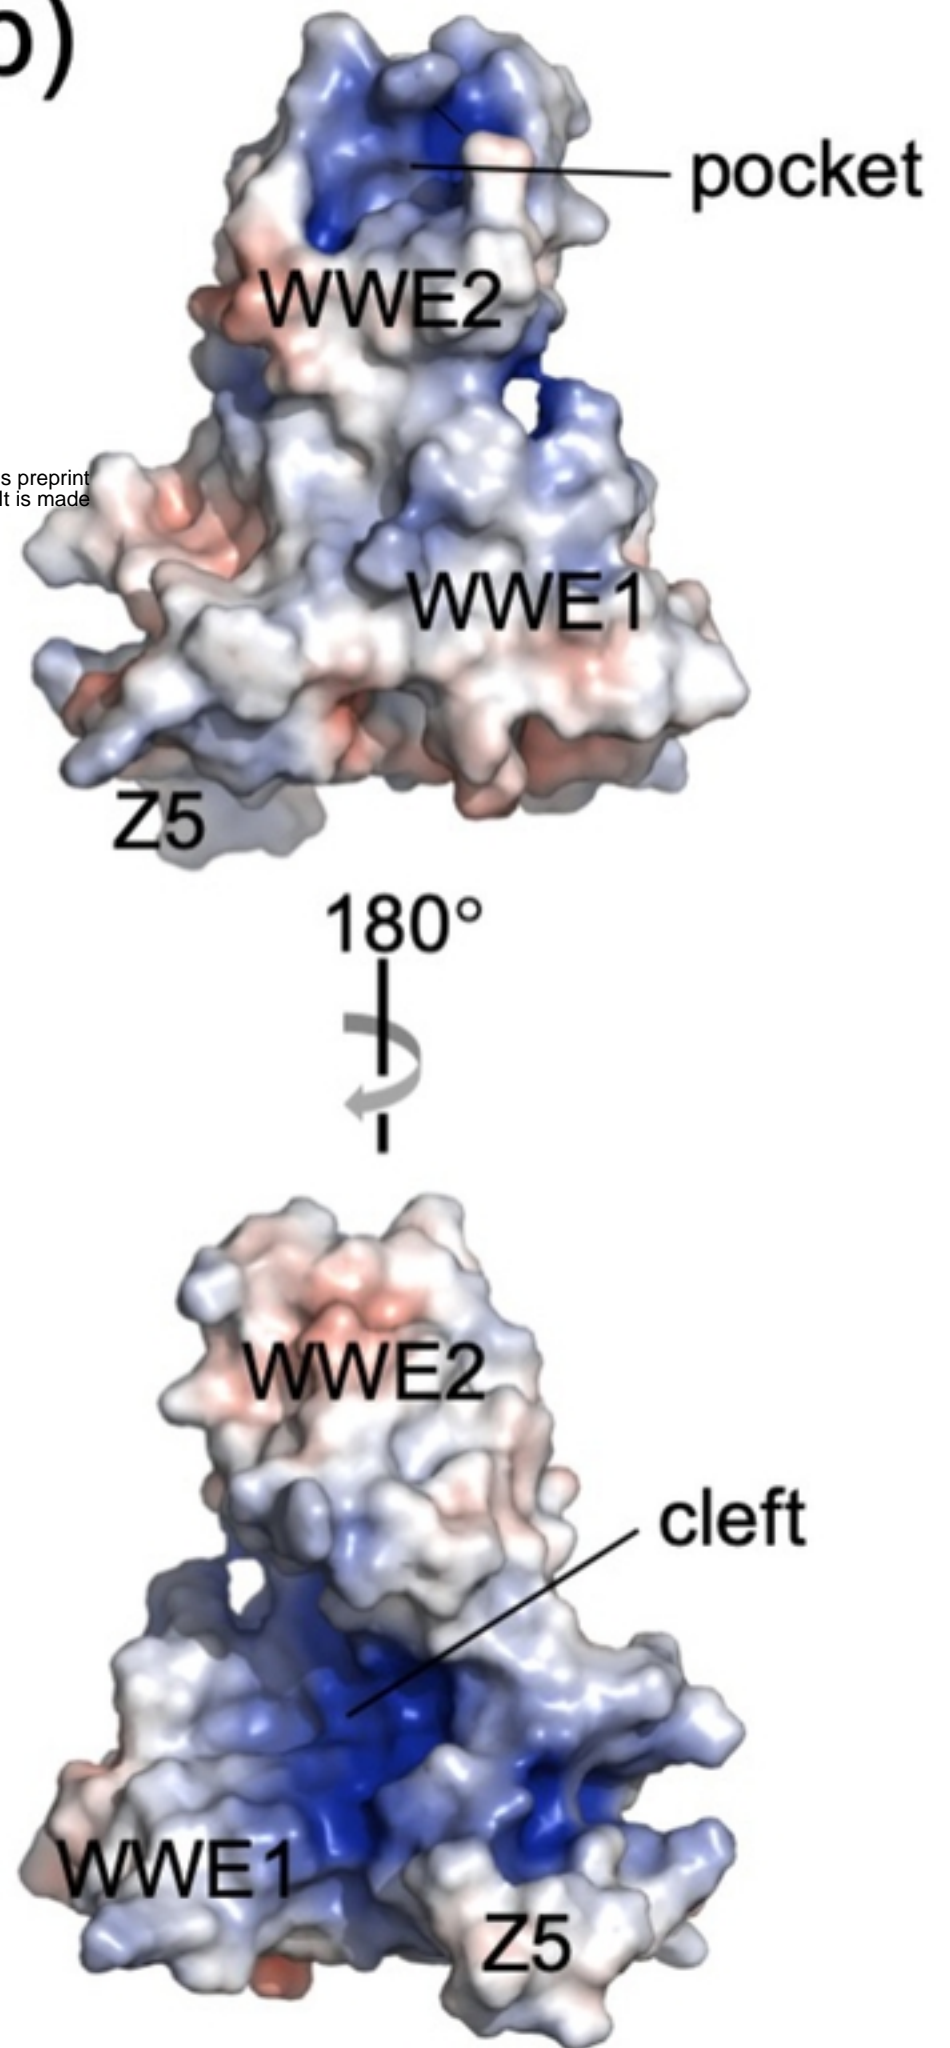

bioRxiv preprint doi: <https://doi.org/10.1101/2020.12.17.423219>; this version posted December 17, 2020. The copyright holder for this preprint (which was not certified by peer review) is the author/funder, who has granted bioRxiv a license to display the preprint in perpetuity. It is made available under aCC-BY 4.0 International license.

(a)

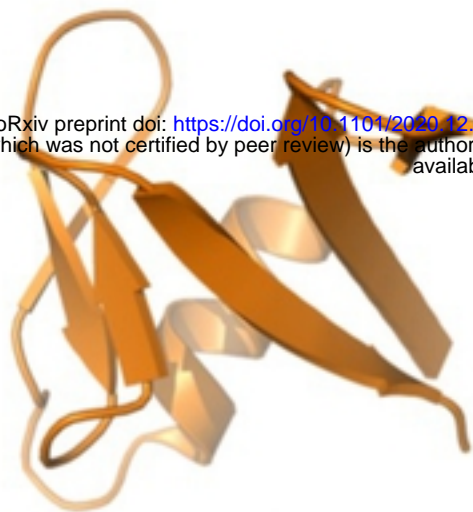

ZAP WWE1

(b)

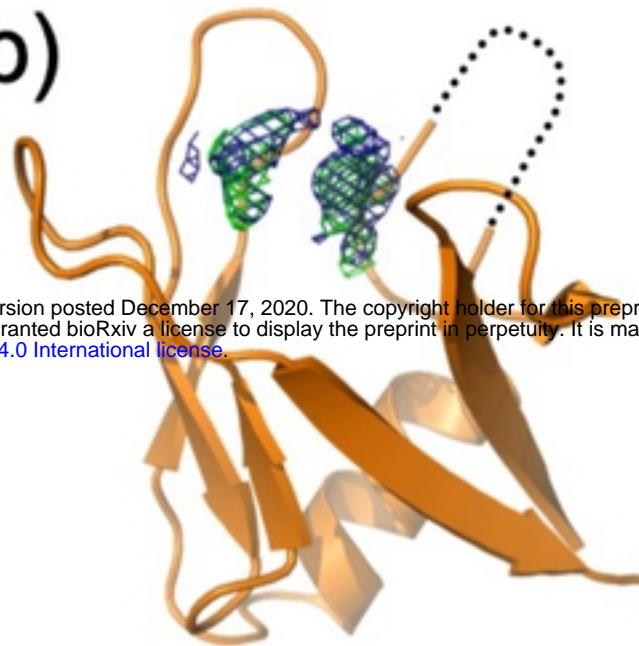

ZAP WWE2

(c)

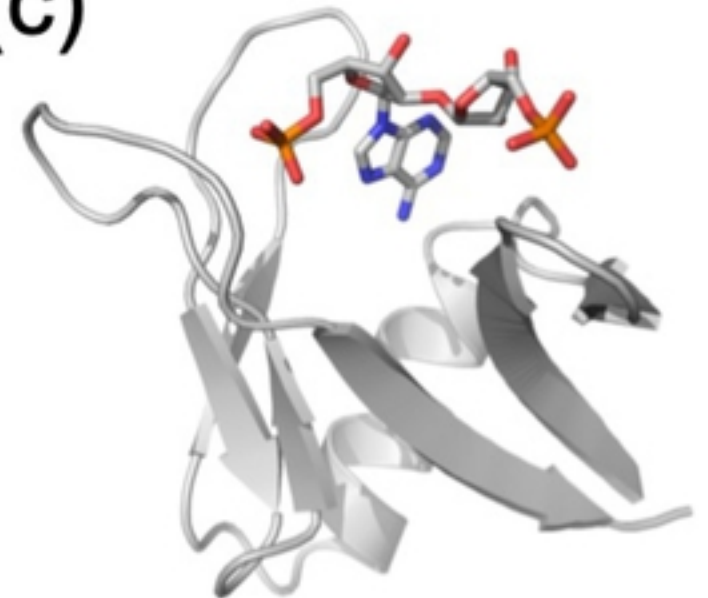

RNF146 WWE  
with bound  
*iso*(ADP-ribose)

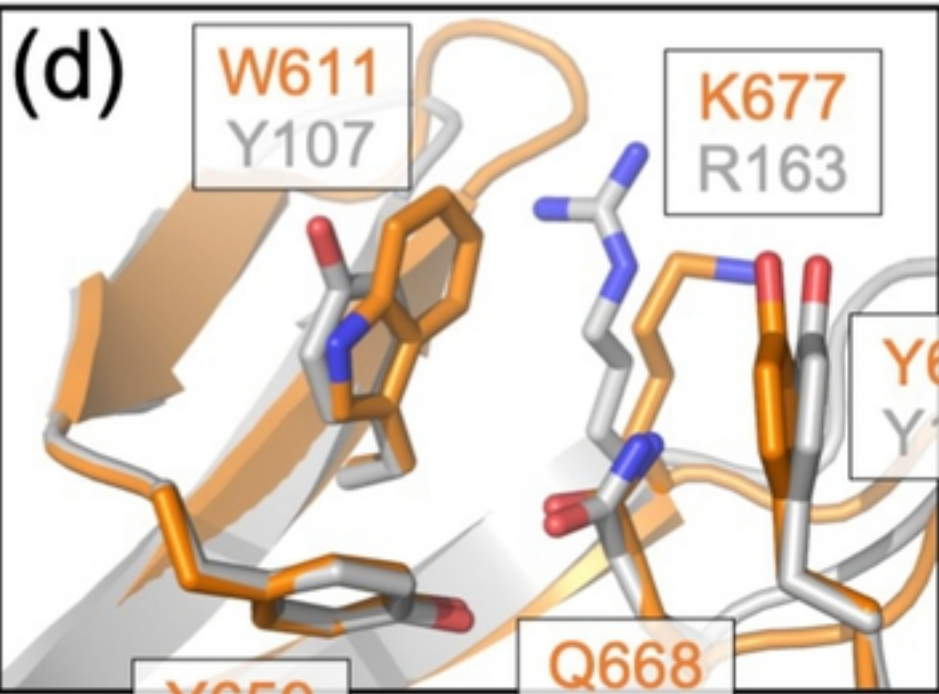

ZAP  
RNF146

(e)

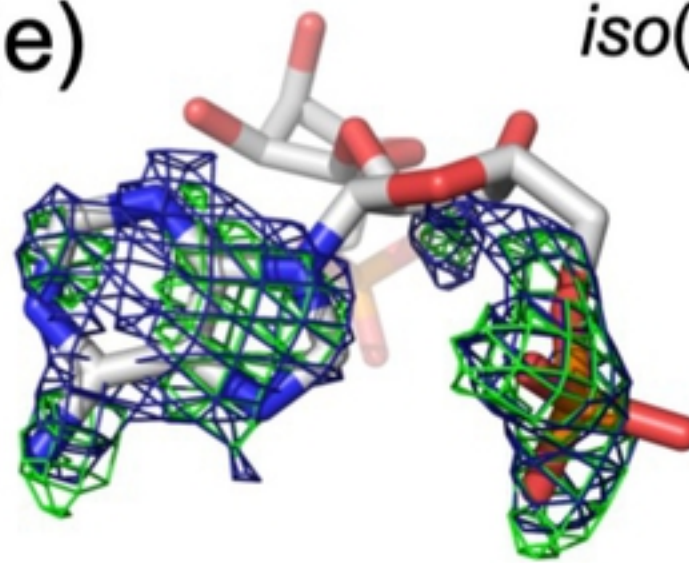

**(a)** PARP1  
NAD<sup>+</sup>  
histones

bioRxiv preprint doi: <https://doi.org/10.1101/2020.12.17.423219>; this version posted December 17, 2020. The copyright holder for this preprint (which was not certified by peer review) is the author/funder, who has granted bioRxiv a license to display the preprint in perpetuity. It is made available under aCC-BY 4.0 International license.

↓  
PARylated  
histones

↓  
Proteinase K  
digestion

↓  
Isopropanol  
precipitation

**(b)**

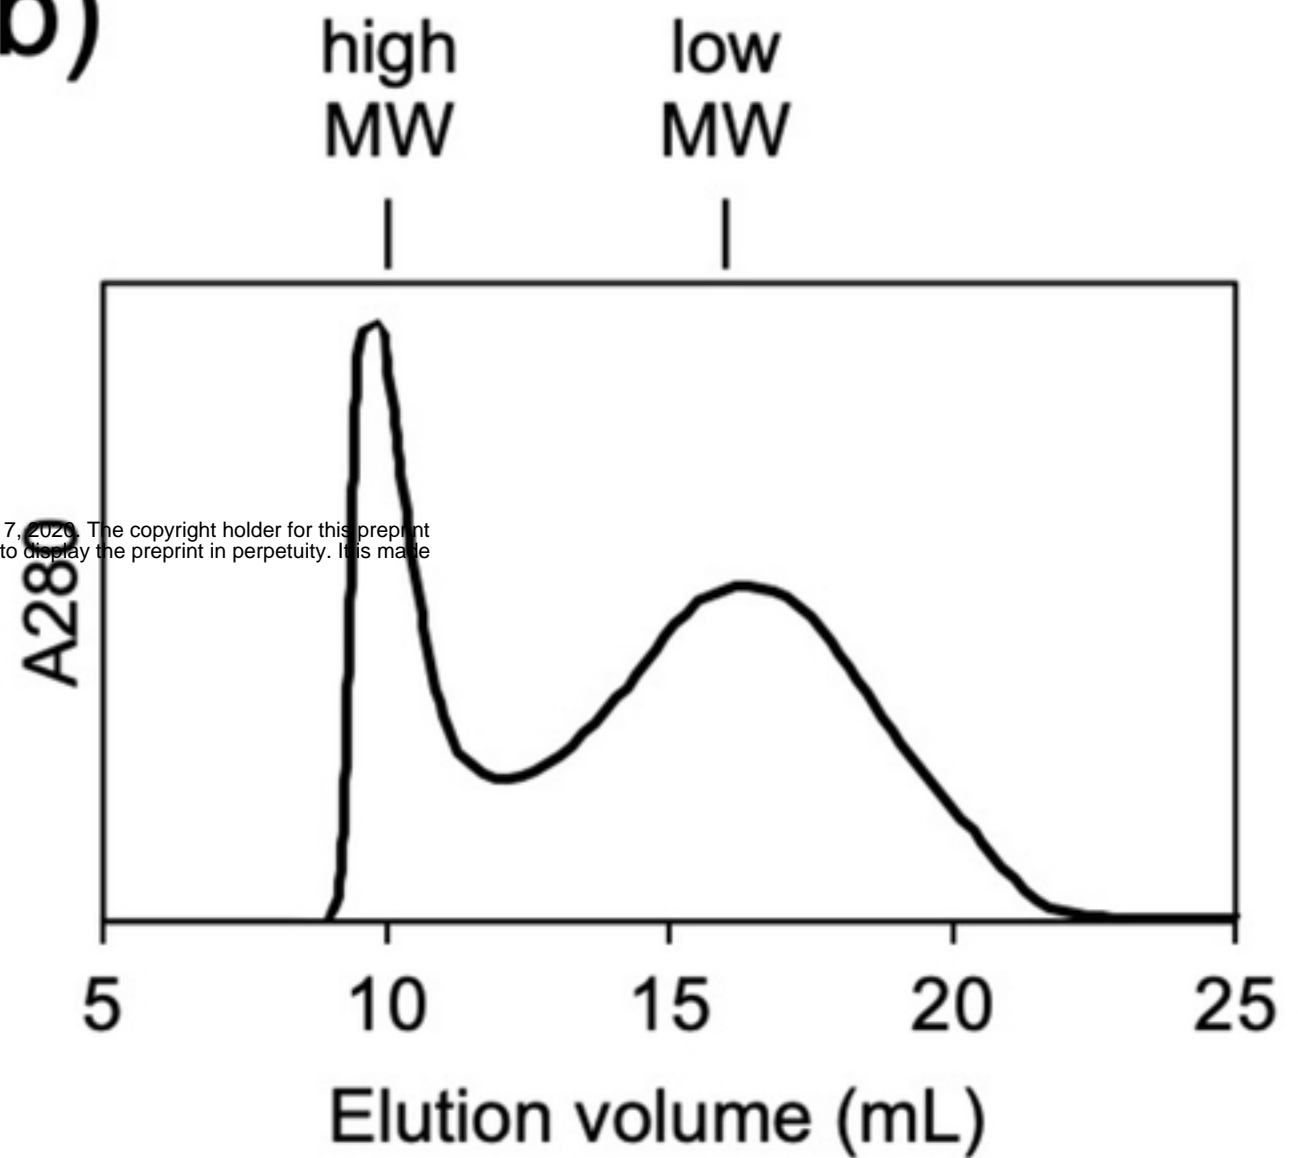

**(c)**

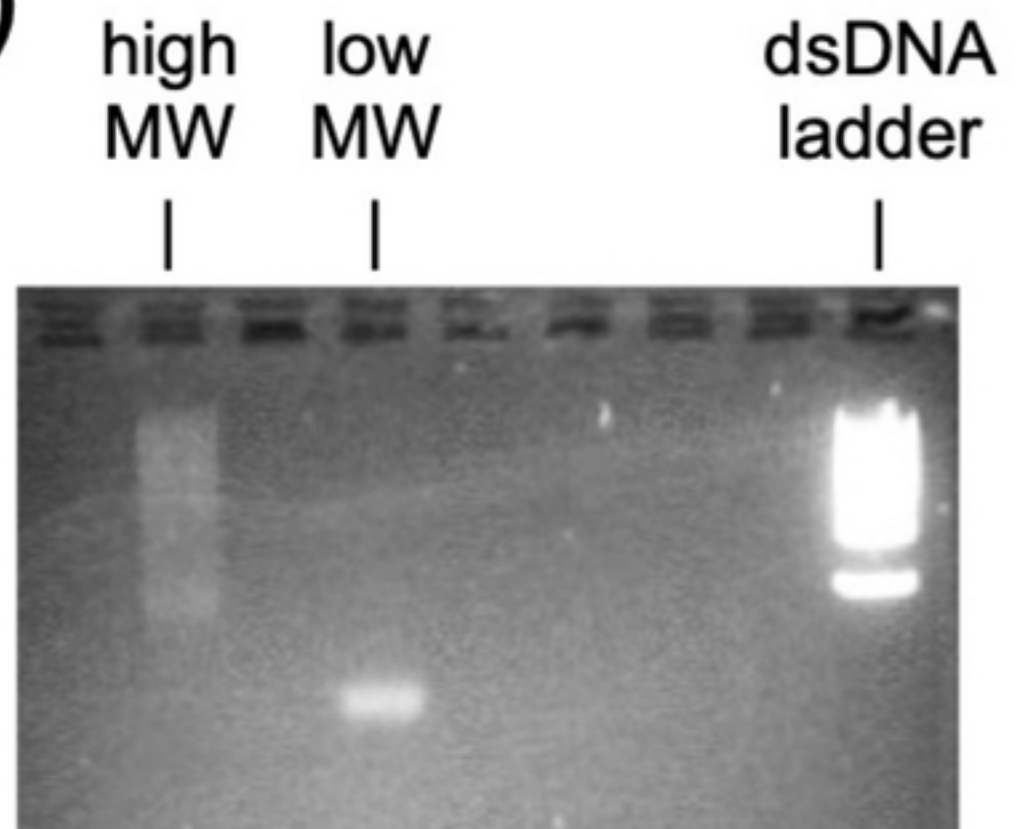

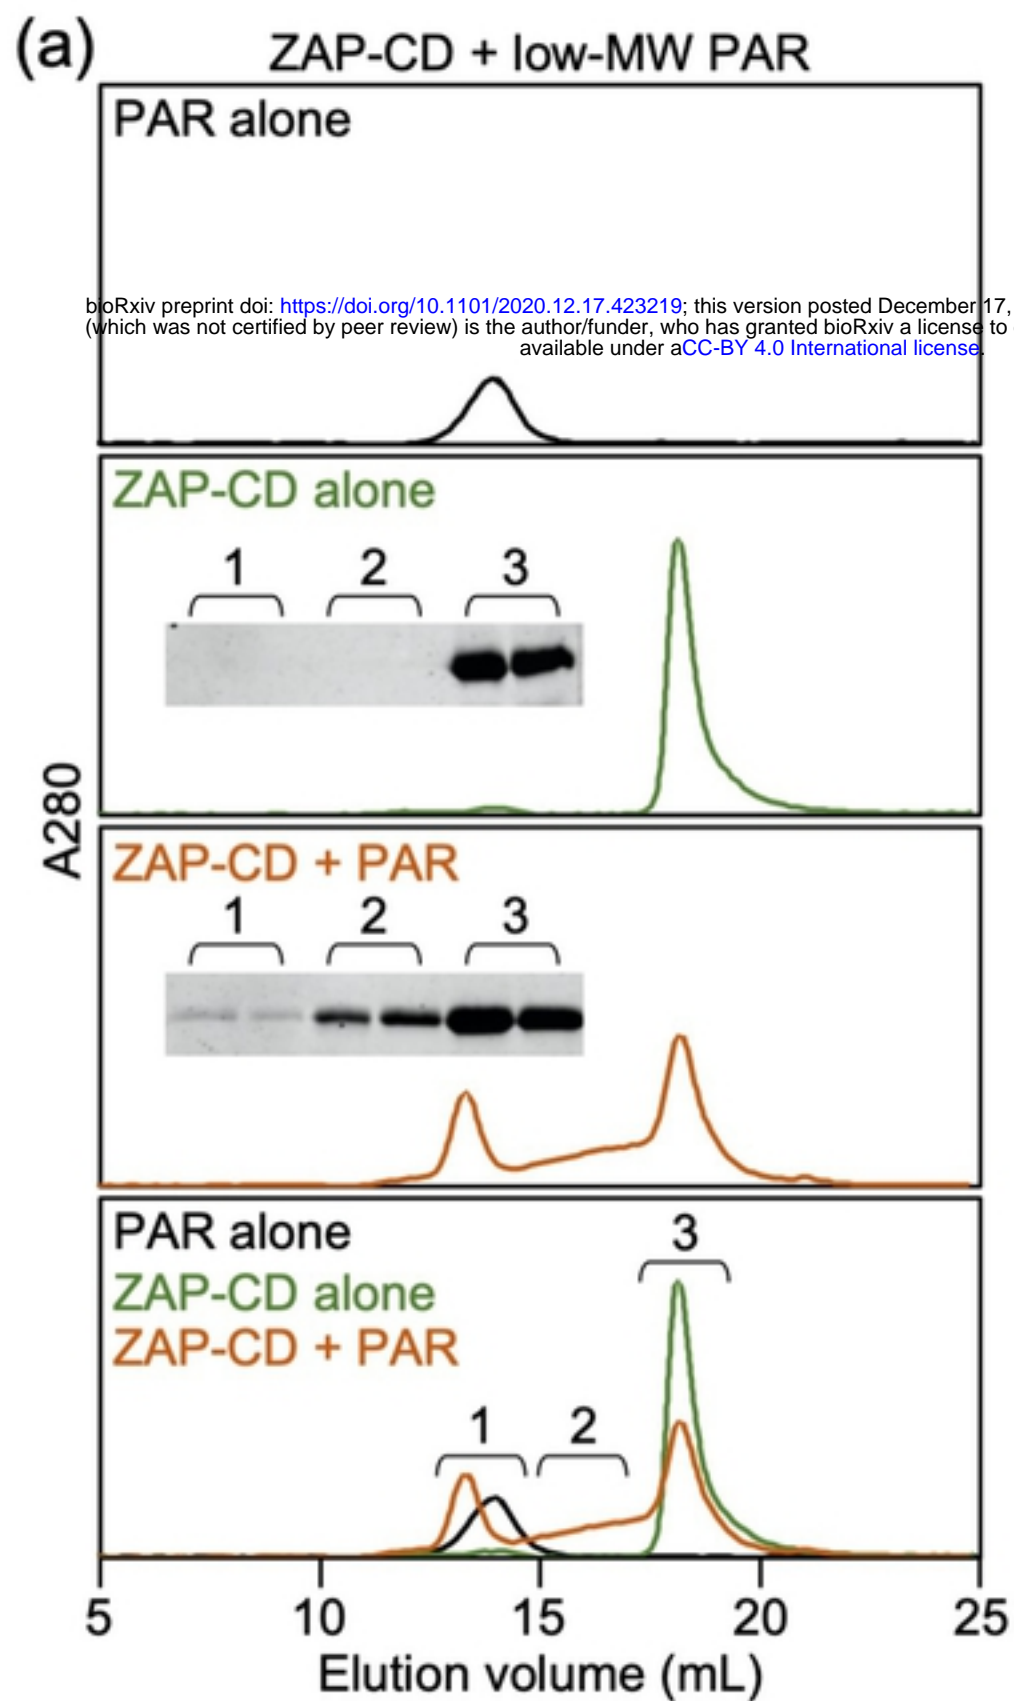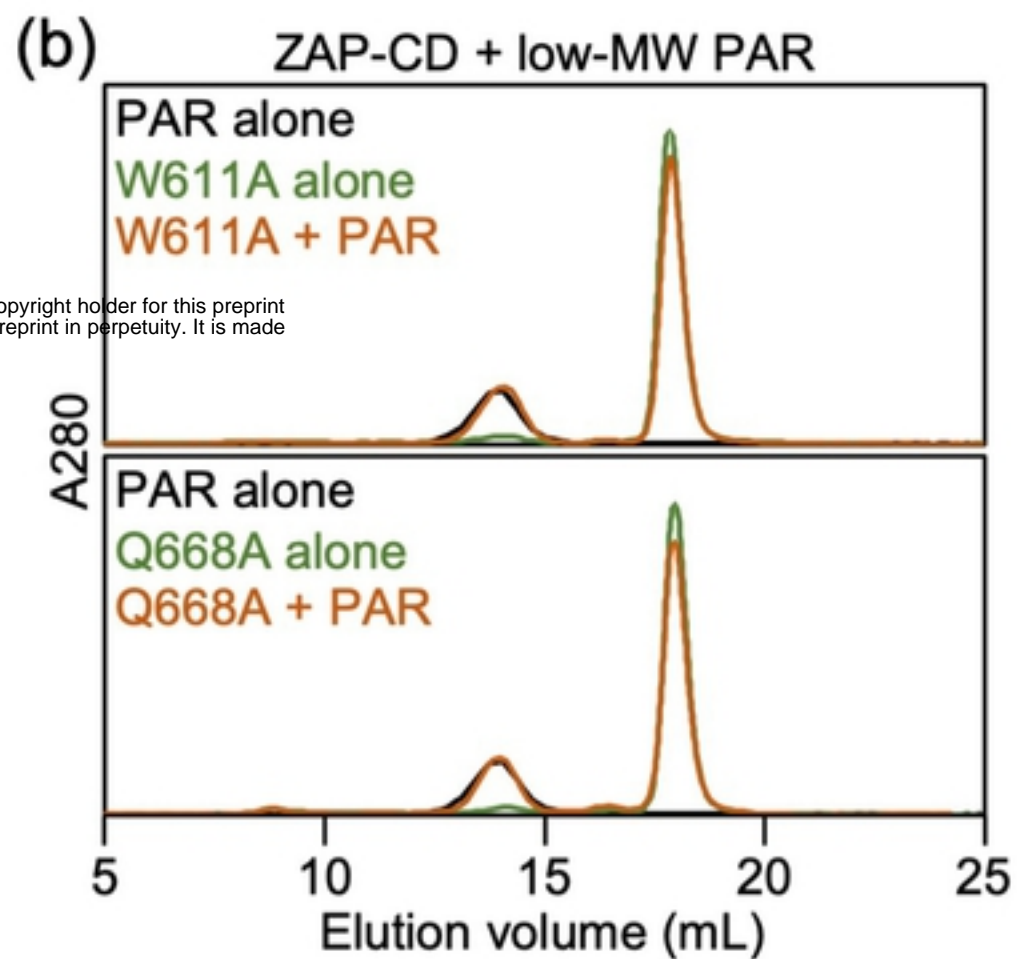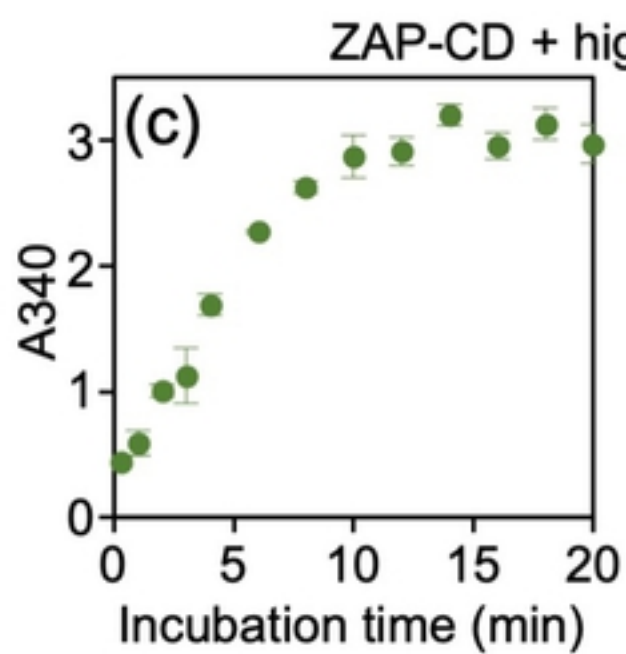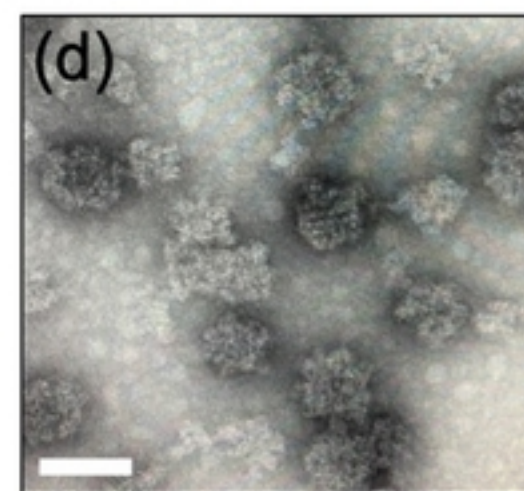

bioRxiv preprint doi: <https://doi.org/10.1101/2020.12.17.423219>; this version posted December 17, 2020. The copyright holder for this preprint (which was not certified by peer review) is the author/funder, who has granted bioRxiv a license to display the preprint in perpetuity. It is made available under aCC-BY 4.0 International license.

bioRxiv preprint doi: <https://doi.org/10.1101/2020.12.17.423219>; this version posted December 17, 2020. The copyright holder for this preprint (which was not certified by peer review) is the author/funder, who has granted bioRxiv a license to display the preprint in perpetuity. It is made available under aCC-BY 4.0 International license.

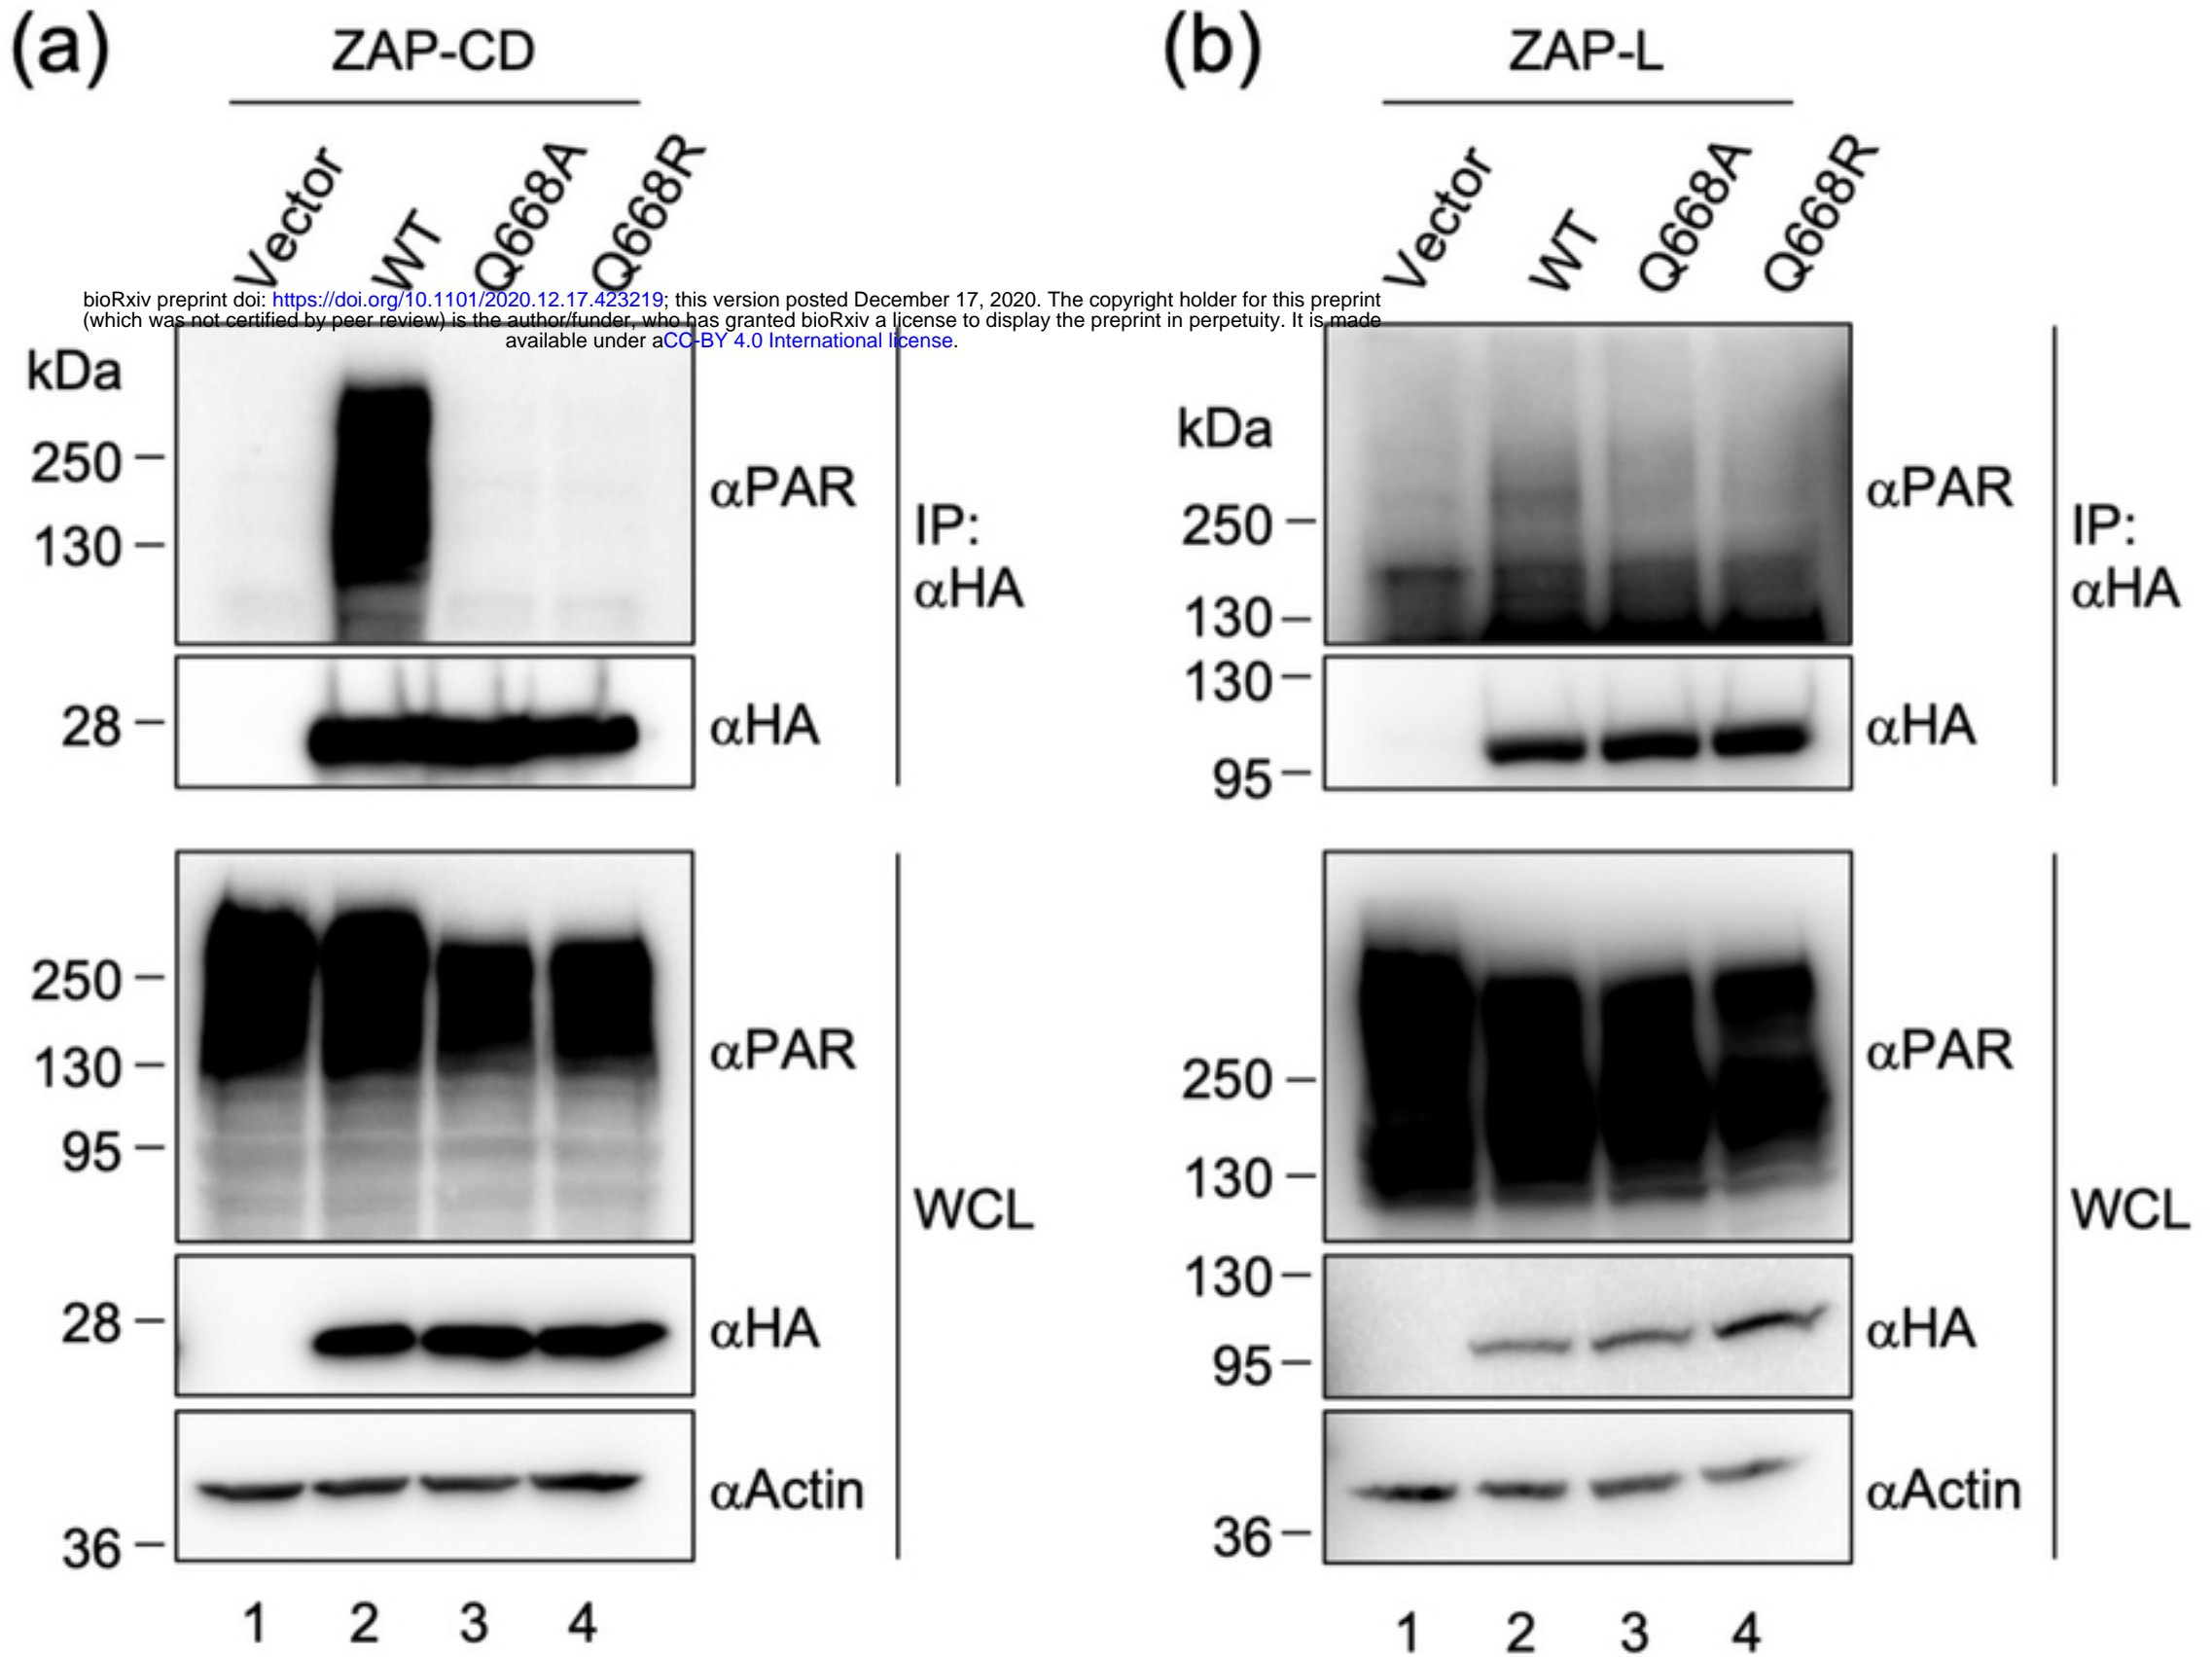



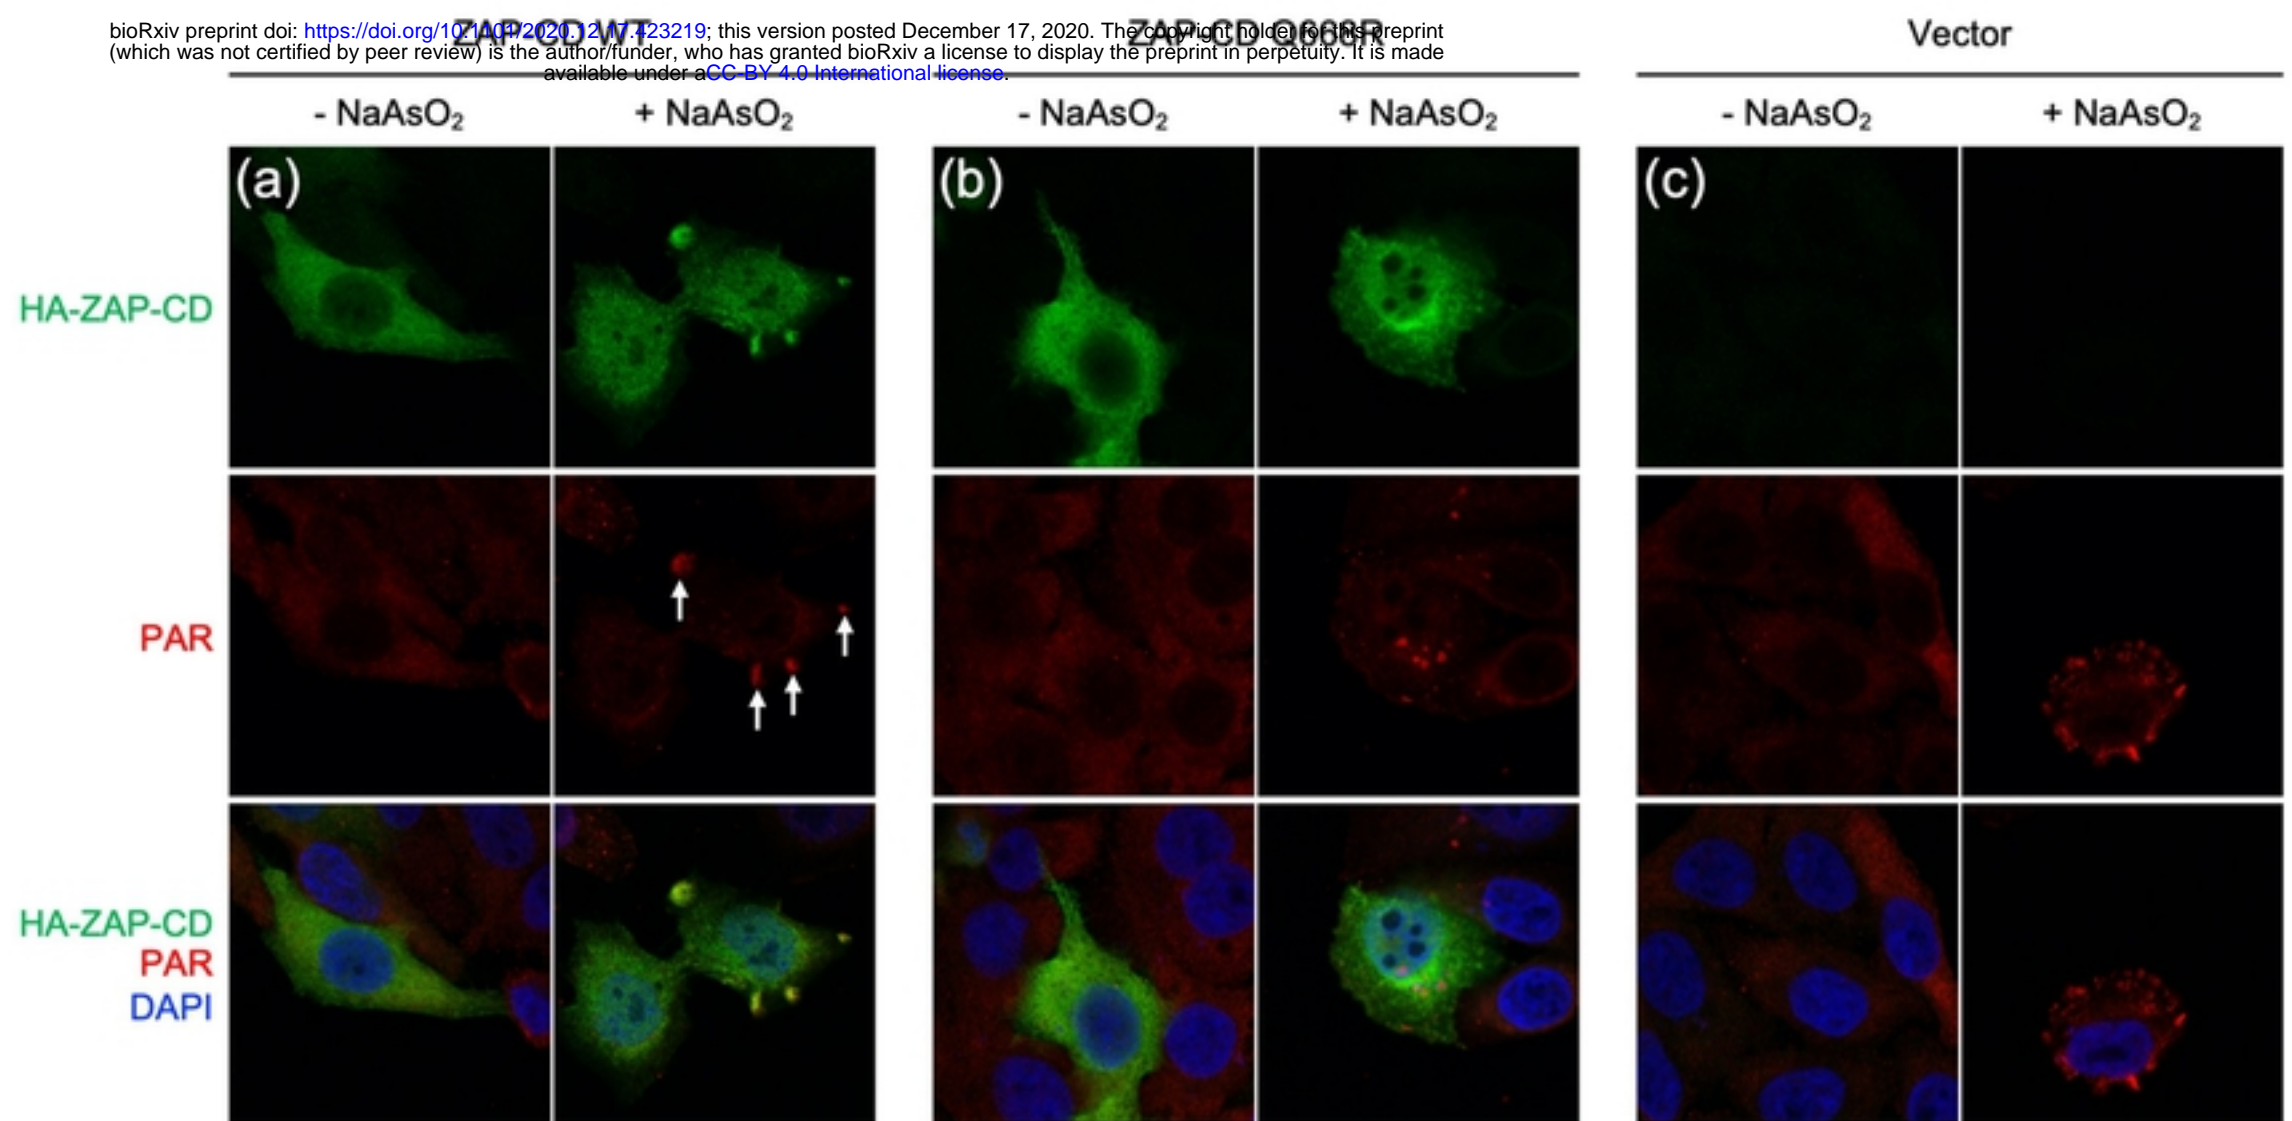

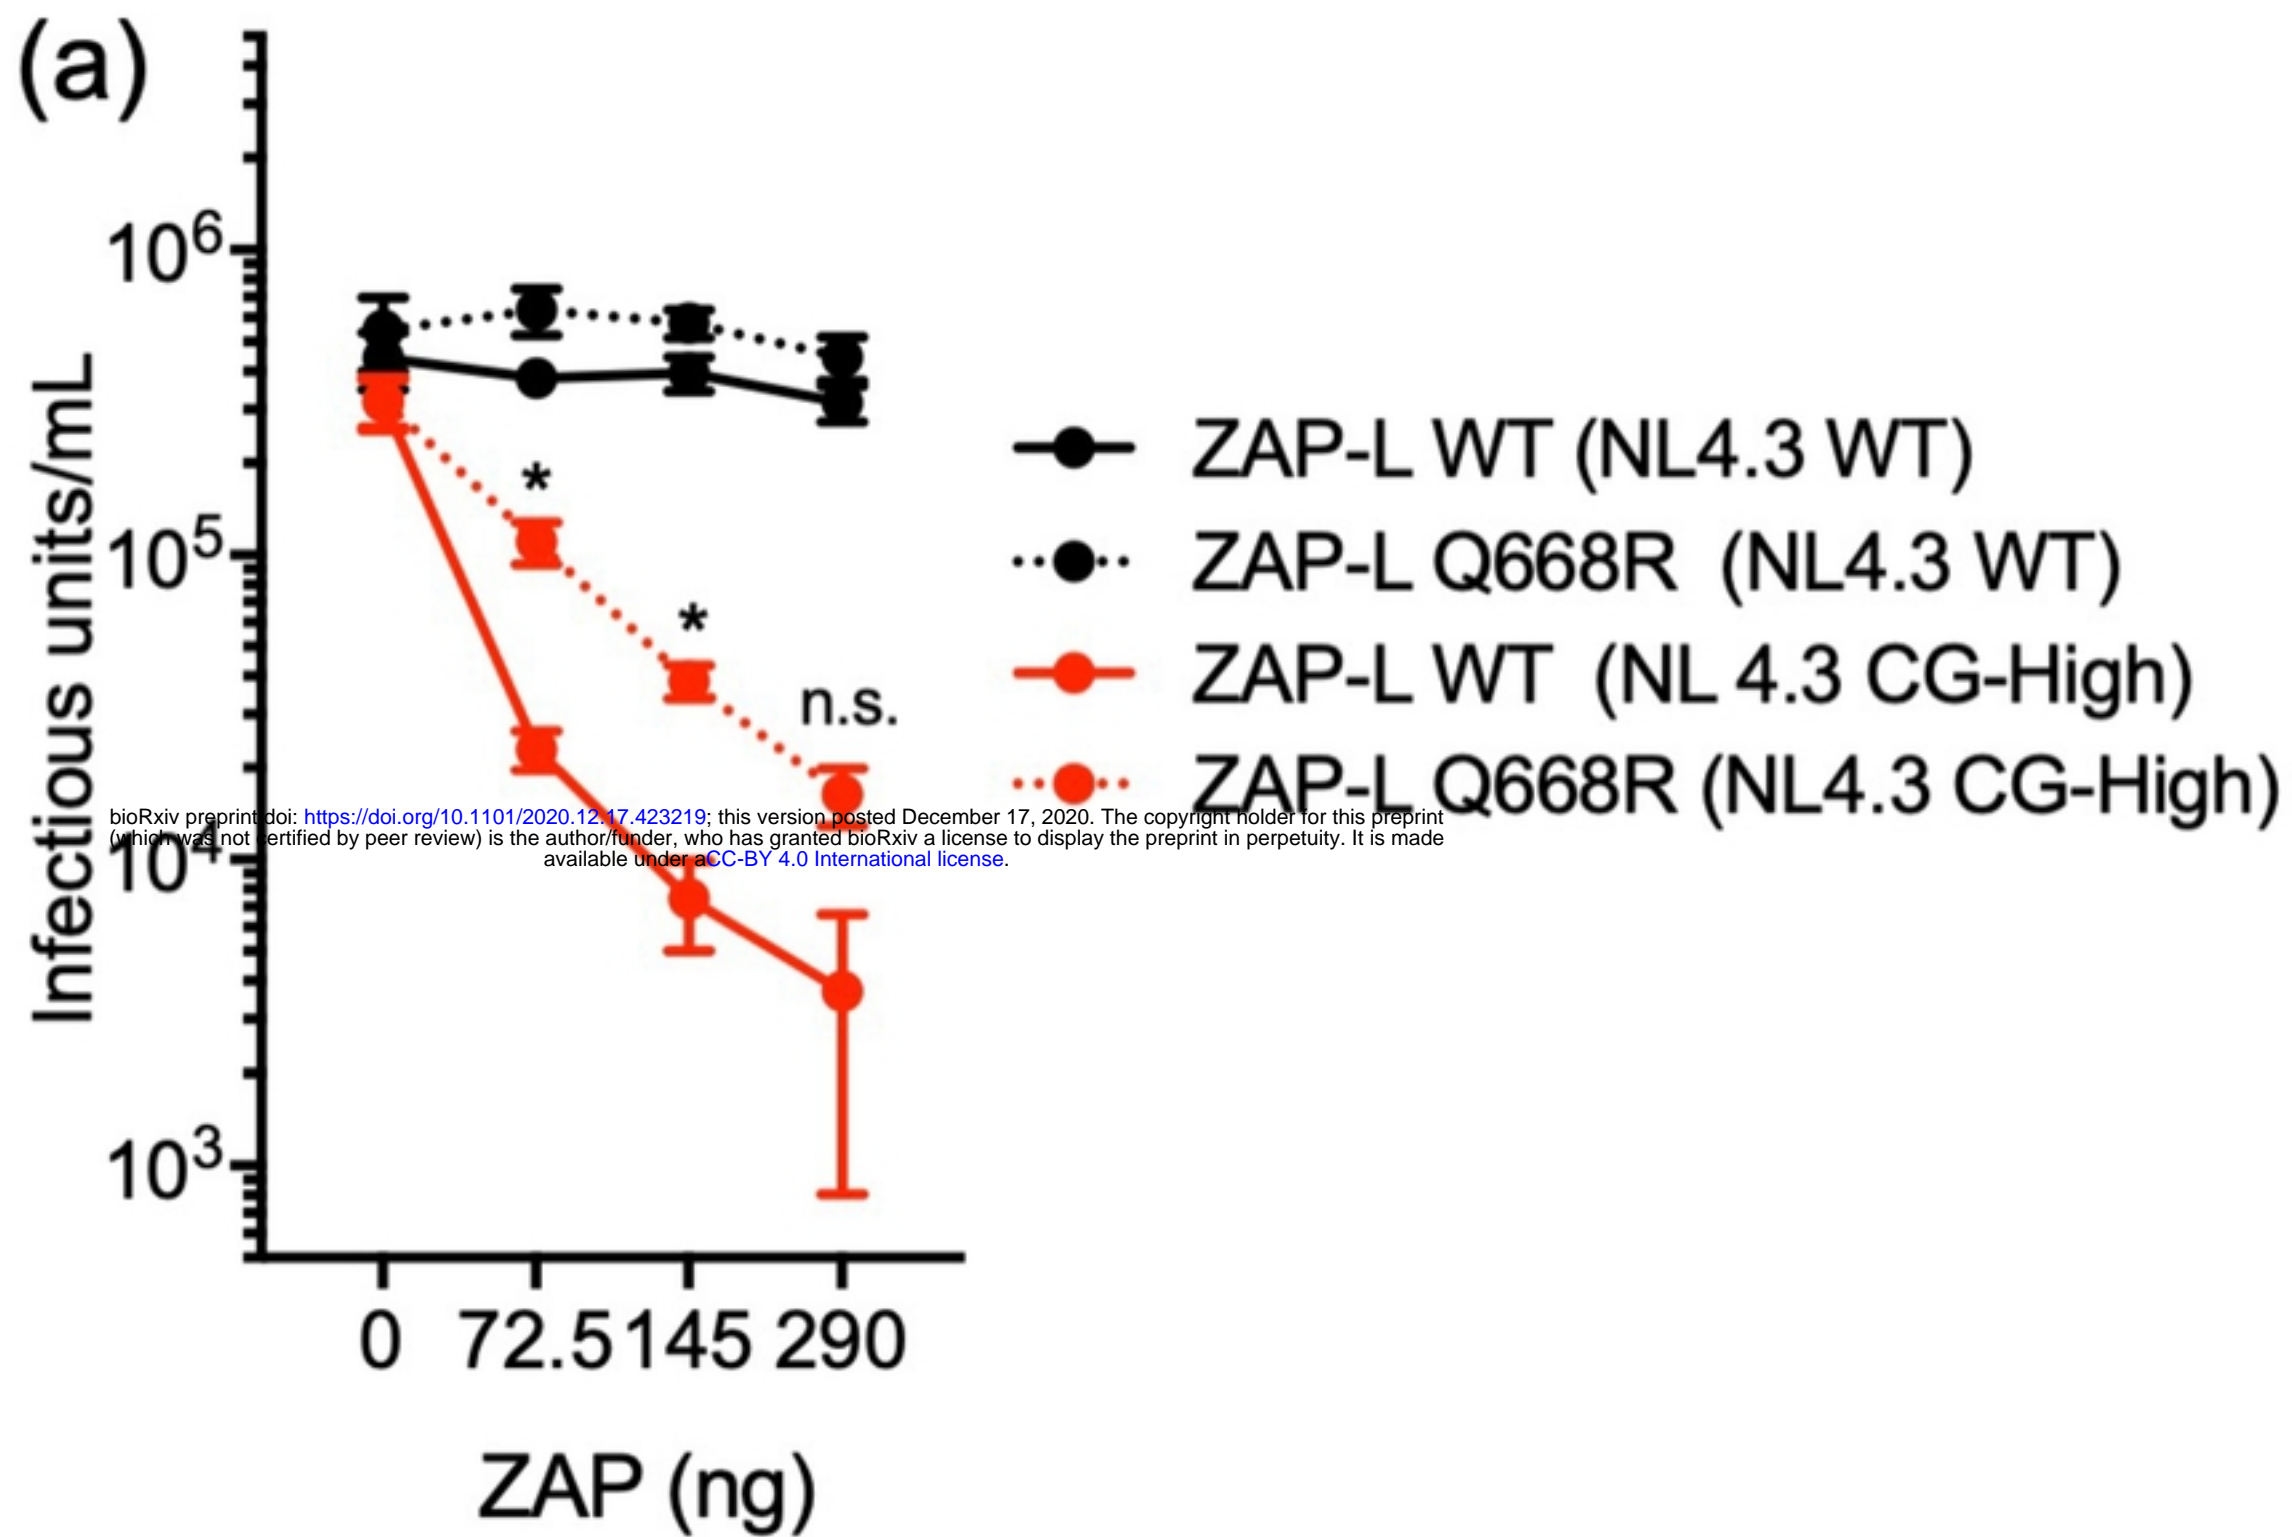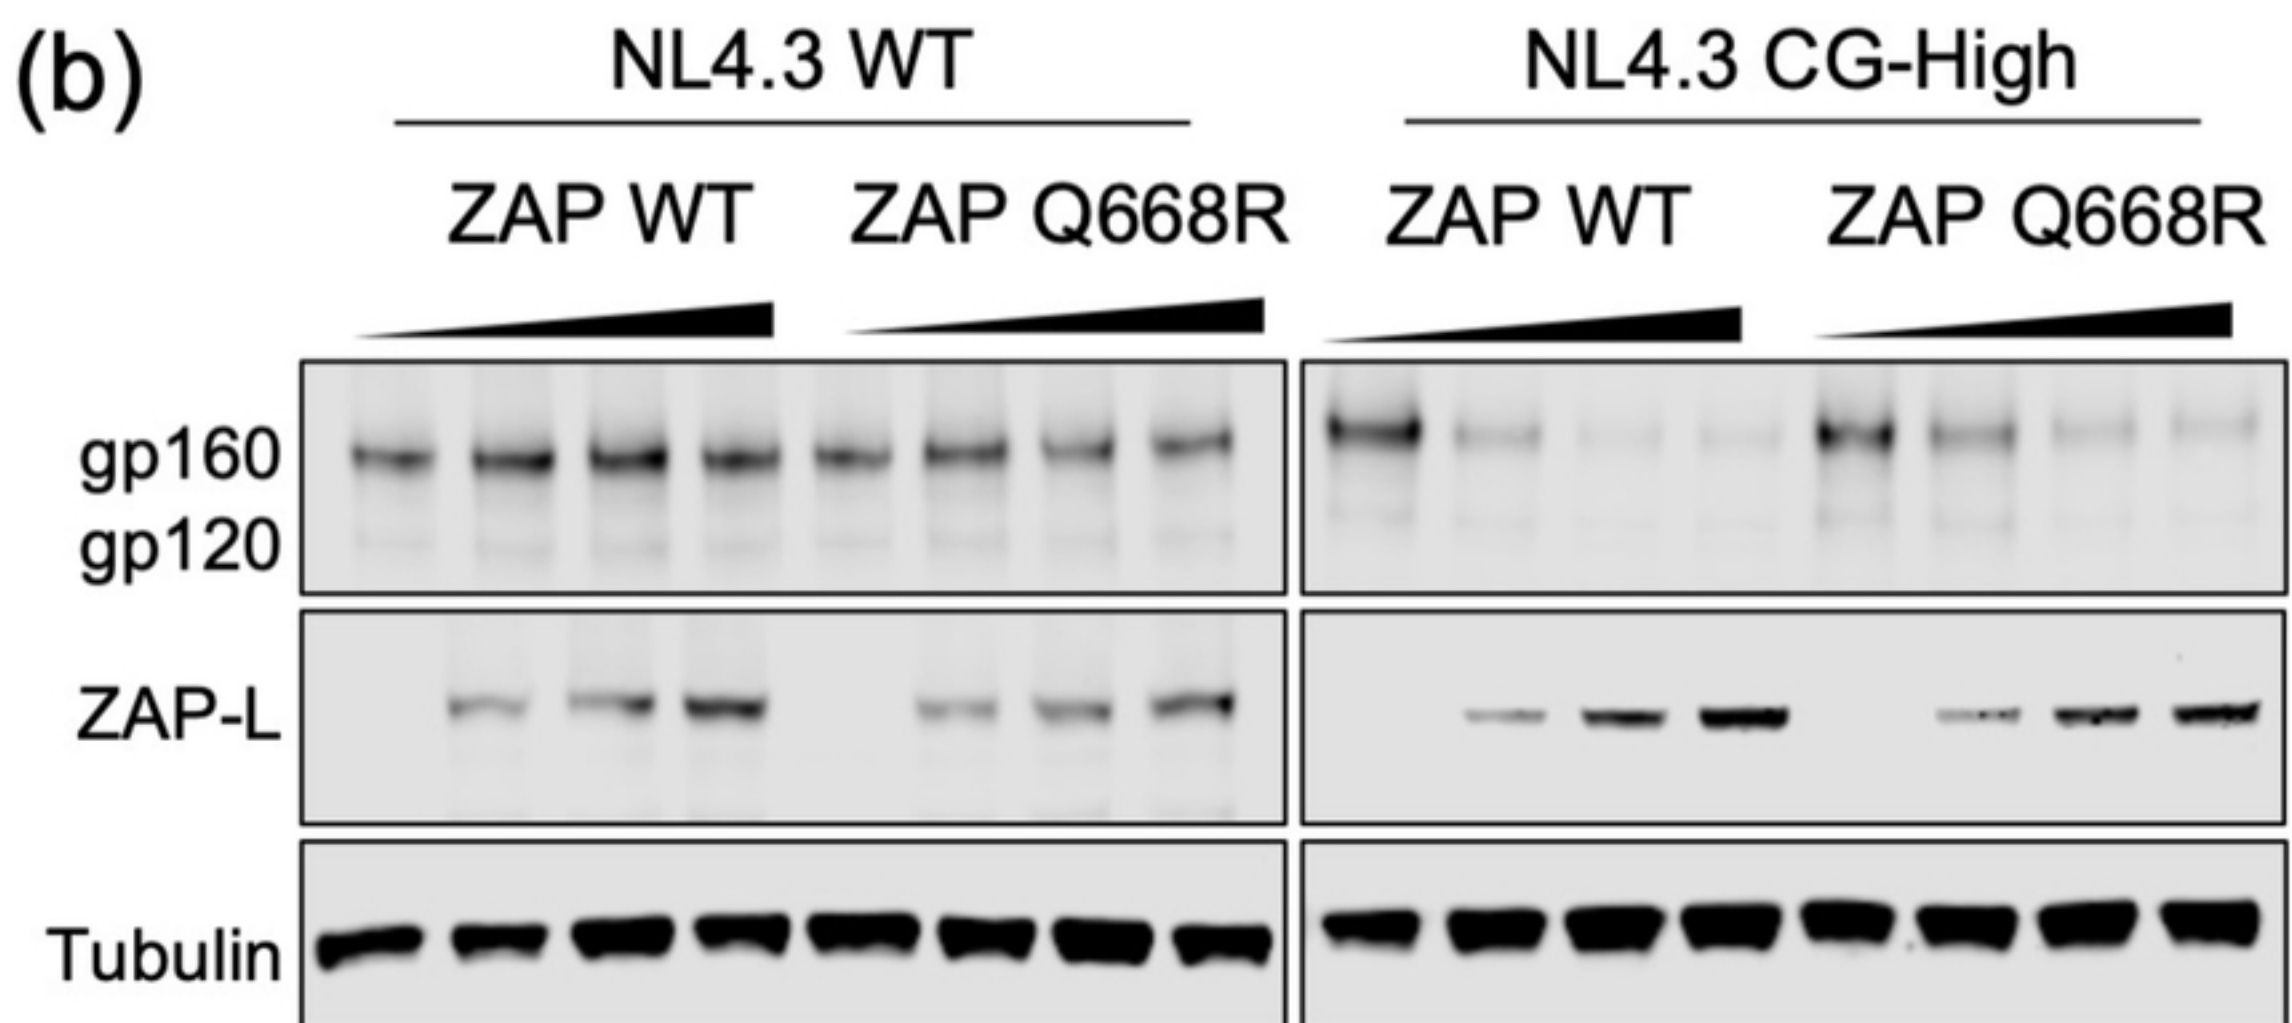

Source: https://www.biorxiv.org/content/10.1101/2020.12.17.423219v1.full.pdf
